# Supplementary material for: Supported Fe catalysts prepared through layered double hydroxides for primary amine synthesis by reductive amination of carbonyl compounds
Source: Royal Society of Chemistry journal article supplement (doi:10.1039/d4cy00536h), 2024-01-01
Supplement: d4cy00536h1.pdf [file d4cy00536h1.pdf]

*Electronic supplementary information (ESI) for*

**Supported Fe Catalysts Prepared through Layered Double  
Hydroxides for Primary Amine Synthesis by Reductive Amination of  
Carbonyl Compounds**

Yusuke Kita, Natsuki Yanagisawa, Mayu Arai, Keigo Kamata, Michikazu Hara

Laboratory for Materials and Structures, Institute of Innovative Research,  
Tokyo Institute of Technology  
Nagatsuta-cho 4259, Midori-ku, Yokohama 226-8503 (Japan)  
Fax: (+81)45-924-5381  
E-mail: [hara.m.ae@m.titech.ac.jp](mailto:hara.m.ae@m.titech.ac.jp)

1. Materials
2. Instruments
3. Preparation of supported Fe catalysts by impregnation method
4. Procedure for IR measurements
5. Calculation method for surface coverage by carbon on supported Fe catalyst
6. Spectral data
7. NMR spectra
8. Additional tables and figures
9. References

## 1. Materials

The following materials were used as received: benzaldehyde (Aldrich), o-tolaldehyde (TCI), *p*-tolaldehyde (TCI), *p*-anisaldehyde (TCI), 4-fluorobenzaldehyde (TCI), 4-bromobenzaldehyde (Acros), furfural (TCI), 3-vinylbenzaldehyde (Aldrich), 2-heptanone (TCI), cyclohexanone (TCI), 2-adamantanone (TCI), acetophenone (TCI), benzonitrile (TCI), *trans*-cinnamaldehyde (TCI), 4-cyanostyrene (Wako), 4-nitrobenzaldehyde (Aldrich), cyclohexane (Kanto Chemical), toluene (Kanto Chemical), tetrahydrofuran (Wako), *N,N*-dimethylformamide (Kanto Chemical), ethanol (Kanto Chemical), dichloroethane (Kanto Chemical), isopropanol (Wako),  $\text{CDCl}_3$  (Kanto Chemical),  $\text{Fe}_2\text{O}_3$  (Aldrich), and acetylene carbon black (Wako). Raney alloy (Aldrich) was activated by the treatment of NaOH according to the report.<sup>S1</sup>

## 2. Instruments

Brunauer–Emmett–Teller (BET) specific surface areas of the samples were measured by nitrogen adsorption–desorption at  $-196\text{ }^\circ\text{C}$  (Quantachrome Nova-4200e). Prior to the adsorption measurements, the samples were degassed in situ under vacuum at  $150\text{ }^\circ\text{C}$  for 1 h. The BET surface area was determined using the multipoint BET algorithm in the  $P/P_0$  range from 0.05 to 0.3. X-ray diffraction (XRD; Ultima IV, Rigaku) patterns of all samples were obtained using Cu  $K\alpha$  radiation (40 kV, 40 mA) in the  $2\theta$  range of  $5\text{--}90^\circ$ . X-ray photoelectron spectroscopy (XPS; ESCA-3200 Shimadzu) measurements were performed using Mg  $K\alpha$  radiation (1486.6 eV). Samples were fixed on double-sided carbon tape as a powder or a pellet. The binding energies were calibrated using sputtered C (1s peak at 285 eV) or vapor-deposited Au (84 eV). Raman spectroscopy was recorded by Raman spectrometer (NSRS-3100, JASCO) using a green laser at 532 nm. The slit width was 0.1 mm. CHN elemental analyses were conducted by Micro coder JM-10 (J-science Lab). Thermogravimetry-differential thermal analysis (TG-DTA) was performed using Thermo plus EV02 with smart loader (RIGAKU). The morphology of LDHs was characterized by field emission scanning electron microscope (FE-SEM) measurements were conducted using field emission scanning microanalyzer (JSM-6700FT, JEOL, Japan) at an accelerating voltage of 5 kV. Transmission electron microscopy (TEM; JEM-2100F, JEOL)-energy dispersive X-ray spectroscopy (EDS, JED-2300T, JEOL) measurements were conducted at an acceleration voltage of 200 kV. Gas-titration and temperature programmed reaction/desorption experiments were performed using an automatic measurement instrument (BELCAT-A, BEL Japan) with thermal conductivity (TCD) and mass (Belmass) detectors. For  $\text{H}_2$ -pulse titration, the cell was loaded with catalyst in a glove box and placed in CATCryo without exposure to atmosphere. For pretreatment, hydrogen reduction was performed at  $650\text{ }^\circ\text{C}$  for 20 minutes, and while the temperature was maintained at  $650\text{ }^\circ\text{C}$ , Ar substitution was performed to remove adsorbed hydrogen. Thereafter, the cell was transferred to a cryostat and cooled to  $-60\text{ }^\circ\text{C}$  under an Ar flow, and pulse measurements were performed while maintaining the cell at  $-60\text{ }^\circ\text{C}$  (carrier gas: Ar, adsorption gas: 5%  $\text{H}_2/\text{Ar}$ ). Before the measurement of  $\text{H}_2$  TPR for the mixture of  $\text{Fe}_2\text{O}_3$  and carbon, 70 mg of  $\text{Fe}_2\text{O}_3$  and 10 mg of carbon was mixed in a mortar for 20 minutes.  $^1\text{H}$  NMR (400 MHz), and  $^{13}\text{C}\{^1\text{H}\}$  NMR (100 MHz)

spectra were measured on Bruker Avance III-400 spectrometers. All  $^1\text{H}$  NMR chemical shifts were recorded in ppm ( $\delta$ ) relative to tetramethylsilane or referenced to the chemical shifts of residual solvent resonances ( $\text{CHCl}_3$  was used as internal standard,  $\delta$  7.26). All  $^{13}\text{C}$  NMR chemical shifts were recorded in ppm ( $\delta$ ) relative to carbon resonances in  $\text{CDCl}_3$  at  $\delta$  77.16. The net amounts of metals were measured using inductively coupled plasma atomic emission spectroscopy (ICP-AES). The 30 mg of sample was calcined at 500 °C for 4 h and totally dissolved by  $\text{HNO}_3$ . Gas chromatography (GC) analyses were conducted using a gas chromatography (GC-18A, Shimadzu) equipped with an InertCap 17 capillary column (internal diameter = 0.25 mm, length = 30 m) and a flame ionization detector (FID).

### 3. Preparation of supported Fe catalysts by impregnation method

20 wt% Fe/support\_im:  $\text{Fe}(\text{NO}_3)_3 \cdot 9\text{H}_2\text{O}$  (1.013 g, 1.25 mmol), support (0.8 g) and water (50 mL) were added to the flask. After the evaporation, the catalyst was dried *in vacuo* at 100 °C for 1 h, calcined with  $\text{N}_2$  flow at 400 °C for 2 h and reduced at 700 °C with  $\text{H}_2$  flow for 2 h. The reduced catalyst was transferred into Ar-filled glovebox without exposure to air.

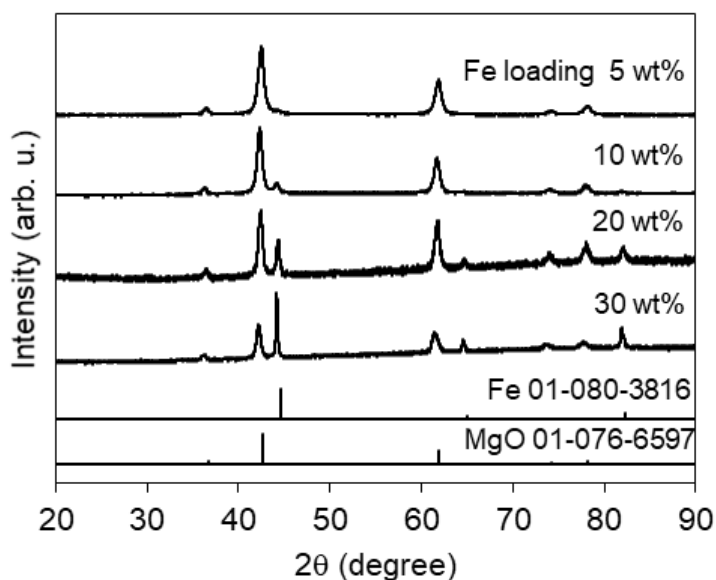

XRD patterns for Fe/MgO\_im with different Fe loading.

### 4. Procedure for IR measurements

$\text{H}_2$ -probed IR measurements were conducted using scratched  $\text{CaF}_2$  plate in an IR cell attached to a closed glass-circulation system. Fe catalyst was deposited on the scratched  $\text{CaF}_2$  plate in Ar-filled glovebox. The sample was reduced with  $\text{H}_2$  flow (80 mL/min) at 500 °C for 0.5 h. After replacing Ar in the closed glass-circulation system and the IR cell to  $\text{H}_2$  by flowing  $\text{H}_2$  (80 mL/min), the temperature was gradually decreased to 25 °C with measuring spectra.

$\text{D}_2$ -probed IR measurements were conducted using the same method as the  $\text{H}_2$  probed measurement method, replacing  $\text{H}_2$  with  $\text{D}_2$ .

## 5. Calculation method for surface coverage by carbon on supported Fe catalyst

In the catalyst prepared by H<sub>2</sub> reduction of LDH-citrate at 600 °C, a peak due to metallic iron can be observed in XRD patterns, indicating that iron particle growth begins at around 550 °C. Calculations were made assuming that all carbon in the precursor remains at the temperature at which particle growth occurs. Since we do not know the structure of the carbon species, we laid out a single layer of carbon atoms on a two-dimensional surface with graphene structure and calculated the occupied area when viewed from above. The area may be smaller since the carbon species are thought to be layered.

Carbon content in the precursor for Fe-C/MgO (n): 2.98 wt%

Specific surface area of Fe-C/MgO (S<sub>BET</sub>): 100 m<sup>2</sup> g<sup>-1</sup>

Area of graphene unit cell including two carbon (S<sub>g</sub>): 5.34 × 10<sup>-20</sup> m<sup>2</sup>

Avogadro number (NA): 6.022 × 10<sup>23</sup> mol<sup>-1</sup>

Molar mass (M<sub>c</sub>): 12.011 g mol<sup>-1</sup>

Surface coverage by carbon on Fe-C/MgO [%]

$$= \frac{n}{100} \times \frac{S_g \times NA}{M_c \times 2 \times S_{BET}} \times 100$$

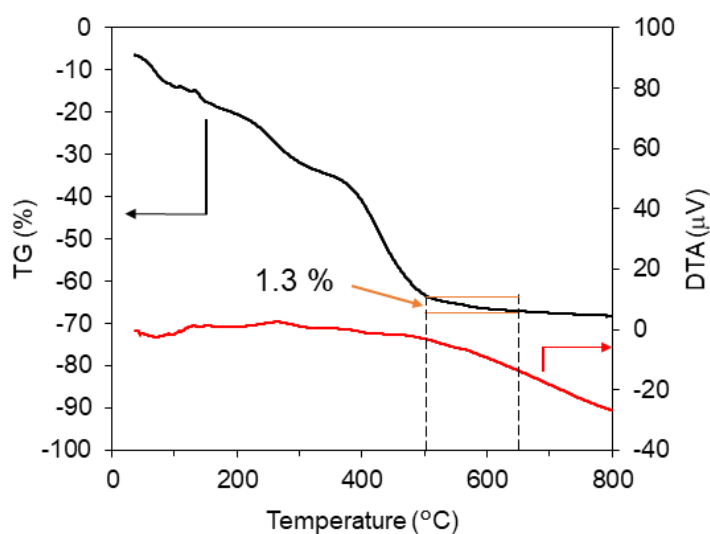

TG-DTA profile with H<sub>2</sub> flow for LDH-citrate\_cal

## 6. Spectral Data

### *o*-Methylbenzylamine<sup>S2</sup>

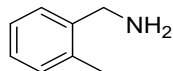

After the reaction was completed, the catalyst was separated by filtration.

<sup>1</sup>H NMR (400 MHz, CDCl<sub>3</sub>): δ = 7.31–7.15 (m, 4H), 3.86 (s, 2H), 2.34 (s, 3H), 1.74 (br, 2H).

<sup>13</sup>C NMR (100 MHz, CDCl<sub>3</sub>): δ = 141.1, 135.6, 130.4, 127.2, 127.0, 126.3, 44.2, 18.9.

### *p*-Methylbenzylamine<sup>S3</sup>

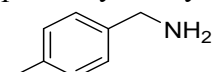

After the reaction was completed, the catalyst was separated by filtration.

<sup>1</sup>H NMR (400 MHz, CDCl<sub>3</sub>): δ = 7.18 (d, *J* = 7.9 Hz, 2H), 7.14 (d, *J* = 7.8 Hz, 2H), 3.81 (s, 2H), 2.33 (s, 3H), 1.64 (br, 2H).

<sup>13</sup>C NMR (100 MHz, CDCl<sub>3</sub>): δ = 140.4, 136.5, 129.3, 127.2, 46.3, 21.2.

### *p*-Methoxybenzylamine<sup>S3</sup>

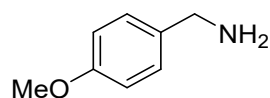

After the reaction was completed, the catalyst was separated by filtration.

<sup>1</sup>H NMR (400 MHz, CDCl<sub>3</sub>): δ = 7.26–7.21 (m, 2H), 6.87 (d, *J* = 8.4 Hz, 2H), 3.80 (s, 5H), 3.65 (s, 2H), 1.56 (br, 2H).

<sup>13</sup>C NMR (100 MHz, CDCl<sub>3</sub>): δ = 158.7, 135.7, 128.4, 114.1, 55.4, 46.0.

### 4-Fluorobenzylamine

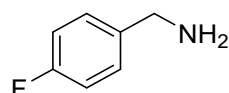

After the reaction, chlorobenzene was added to the reaction mixture as an external standard, and analyzed by GC measurement. Formation of the title compound was determined by GC-MS measurement.

### 4-Bromobenzylamine<sup>S3</sup>

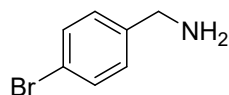

After the reaction, the catalyst was separated by filtration. The crude product was obtained by evaporation and analyzed by NMR analysis with phenanthrene as an internal standard. Formation of the title compound was determined by GC-MS measurement.

<sup>1</sup>H NMR (400 MHz, CDCl<sub>3</sub>): δ = 7.47 (d, *J* = 8.3 Hz, 2H), 7.20 (d, *J* = 8.2 Hz, 2H),

3.83 (s, 2H), 1.60 (br, 2H)

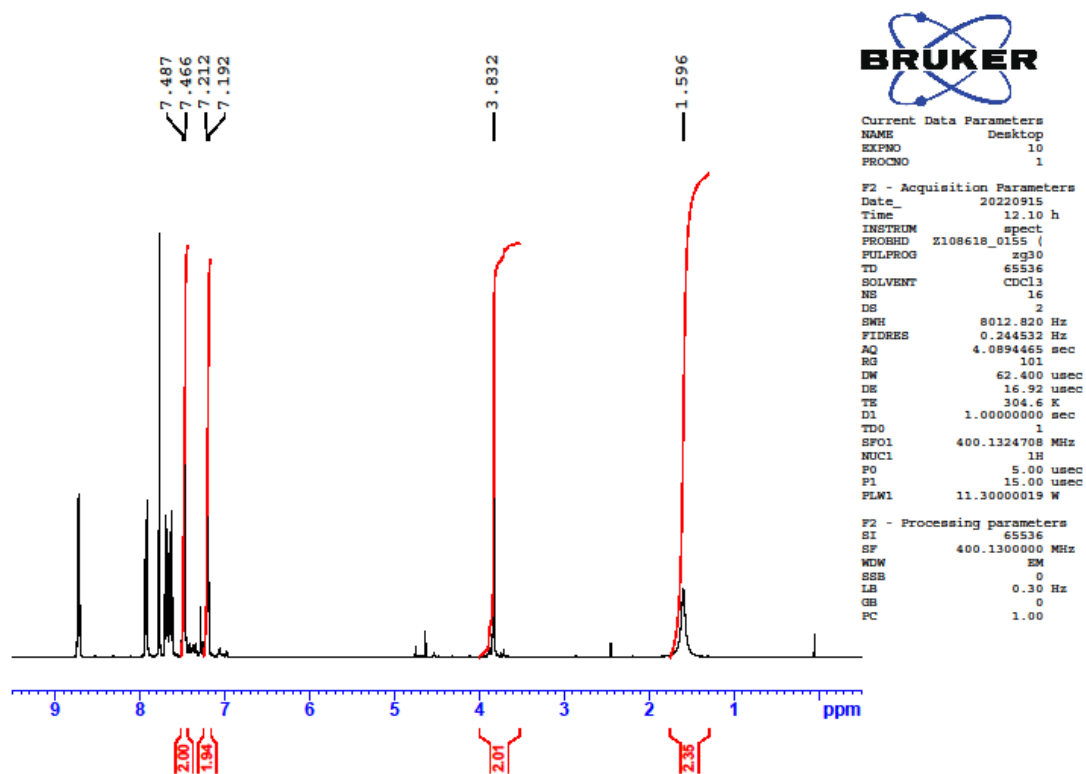

3-Vinylbenzylamine<sup>S3</sup>

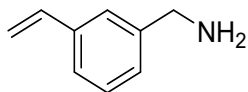

After the reaction, the catalyst was separated by filtration. The crude product was obtained by evaporation and analyzed by NMR analysis with phenanthrene as an internal standard. Formation of the title compound was determined by GC-MS measurement.

<sup>1</sup>H NMR (400 MHz, CDCl<sub>3</sub>):  $\delta$  = 7.29–7.05 (m, 4H), 6.68 (dd,  $J$  = 11.2, 17.2 Hz, 1H), 5.74 (d,  $J$  = 17.6 Hz, 1H), 5.23 (d,  $J$  = 10.8 Hz, 1H), 3.78 (s, 2H).

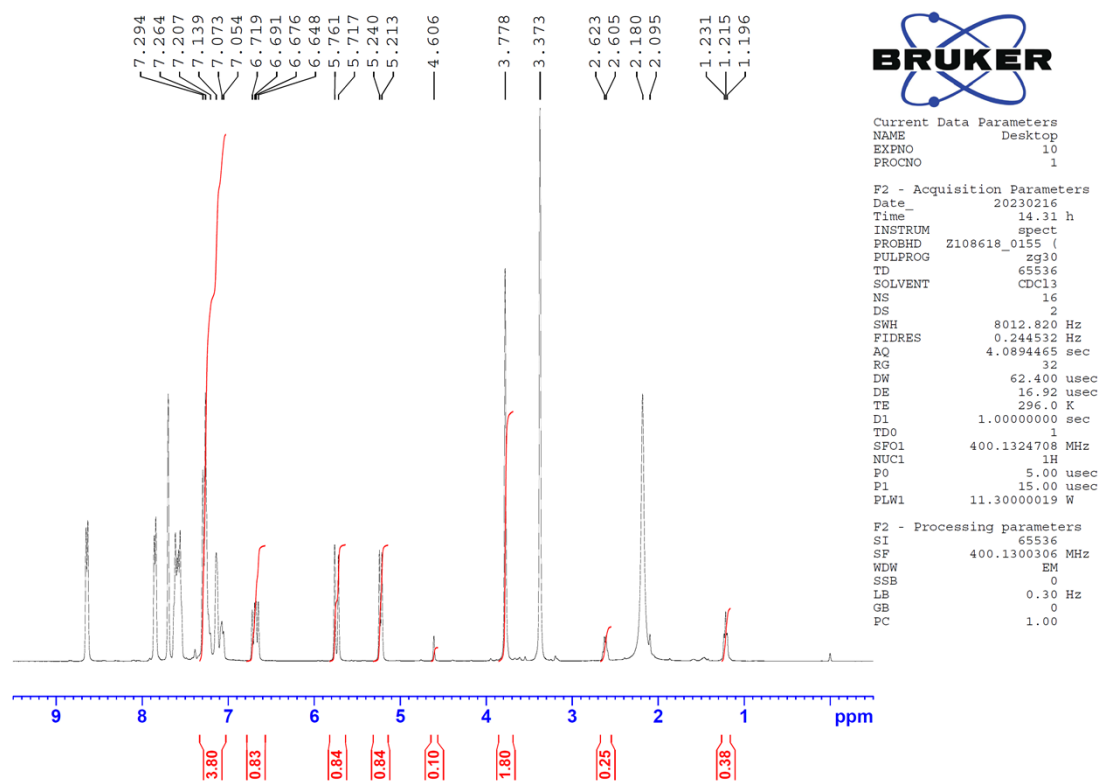

### Furfurylamine

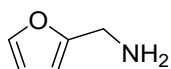

After the reaction, chlorobenzene was added to the reaction mixture as an external standard, and analyzed by GC measurement. Formation of the title compound was determined by GC-MS measurement.

### 2-Heptylamine<sup>S5</sup>

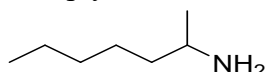

After the reaction was completed, the catalyst was separated by filtration.

<sup>1</sup>H NMR (400 MHz, CDCl<sub>3</sub>): δ = 2.87 (m, 1H), 1.30–1.16 (m, 8H), 1.05 (d, *J* = 4.7 Hz, 3H), 0.89 (t, *J* = 6.3 Hz, 3H).

<sup>13</sup>C NMR (100 MHz, CDCl<sub>3</sub>): δ = 47.1, 40.3, 32.1, 26.2, 24.1, 22.8, 14.1.

### Cyclohexylamine<sup>S6</sup>

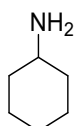

After the reaction was completed, the catalyst was separated by filtration.

<sup>1</sup>H NMR (400 MHz, CDCl<sub>3</sub>): δ = 2.66–2.58 (m, 1H), 1.83–1.80 (m, 2H), 1.74–1.69 (m, 2H), 1.62–1.53 (m, 3H), 1.31–1.21 (m, 2H), 1.17–0.99 (m, 3H).

$^{13}\text{C}$  NMR (100 MHz,  $\text{CDCl}_3$ ):  $\delta = 50.6, 37.0, 25.8, 25.3$ .

#### 2-Aminoadamantane<sup>S7</sup>

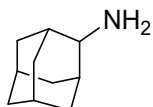

After the reaction was completed, the catalyst was separated by filtration.

$^1\text{H}$  NMR (400 MHz,  $\text{CDCl}_3$ ):  $\delta = 2.98$  (s, 1H), 1.98 (d,  $J = 12.6$  Hz, 2H), 1.86–1.72 (m, 10H), 1.53 (d,  $J = 17.8$  Hz, 2H).

$^{13}\text{C}$  NMR (100 MHz,  $\text{CDCl}_3$ ):  $\delta = 55.5, 38.0, 37.8, 35.2, 30.8, 27.8, 27.4$ .

#### 1-Phenylethylamine<sup>S8</sup>

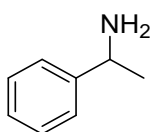

After the reaction was completed, the catalyst was separated by filtration.

$^1\text{H}$  NMR (400 MHz,  $\text{CDCl}_3$ ):  $\delta = 7.32$  (m, 4H), 7.23 (m, 1H), 4.09 (q,  $J = 6.3$  Hz, 1H), 1.65 (br s, 2H), 1.37 (d,  $J = 6.3$  Hz, 3H)

$^{13}\text{C}$  NMR (100 MHz,  $\text{CDCl}_3$ ):  $\delta = 147.8, 128.5, 126.9, 125.7, 51.4, 25.7$ .

#### Cinnamyl alcohol

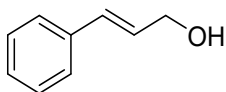

After the reaction, chlorobenzene was added to the reaction mixture as an external standard, and analyzed by GC measurement. Formation of the title compound was determined by GC-MS measurement.

#### Benzylamine

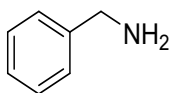

After the reaction, chlorobenzene was added to the reaction mixture as an external standard, and analyzed by GC measurement. Formation of the title compound was determined by GC-MS measurement.

#### 4-vinylbenzylamine

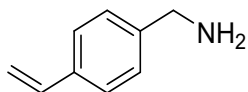

After the reaction, the catalyst was separated by filtration. The crude product was obtained by evaporation and analyzed by NMR analysis with phenanthrene as an internal standard. Formation of the title compound was determined by GC-MS



measurement.

$^1\text{H}$  NMR (400 MHz,  $\text{CDCl}_3$ ):  $\delta = 7.36$  (d,  $J = 6.8$  Hz, 2H),  $7.24$  (d,  $J = 7.1$  Hz, 2H),  $6.70$  (dd,  $J = 17.6, 10.8$  Hz, 1H),  $5.72$  (d,  $J = 17.6$  Hz, 1H),  $5.21$  (d,  $J = 10.8$  Hz, 1H),  $3.83$  (s, 2H).

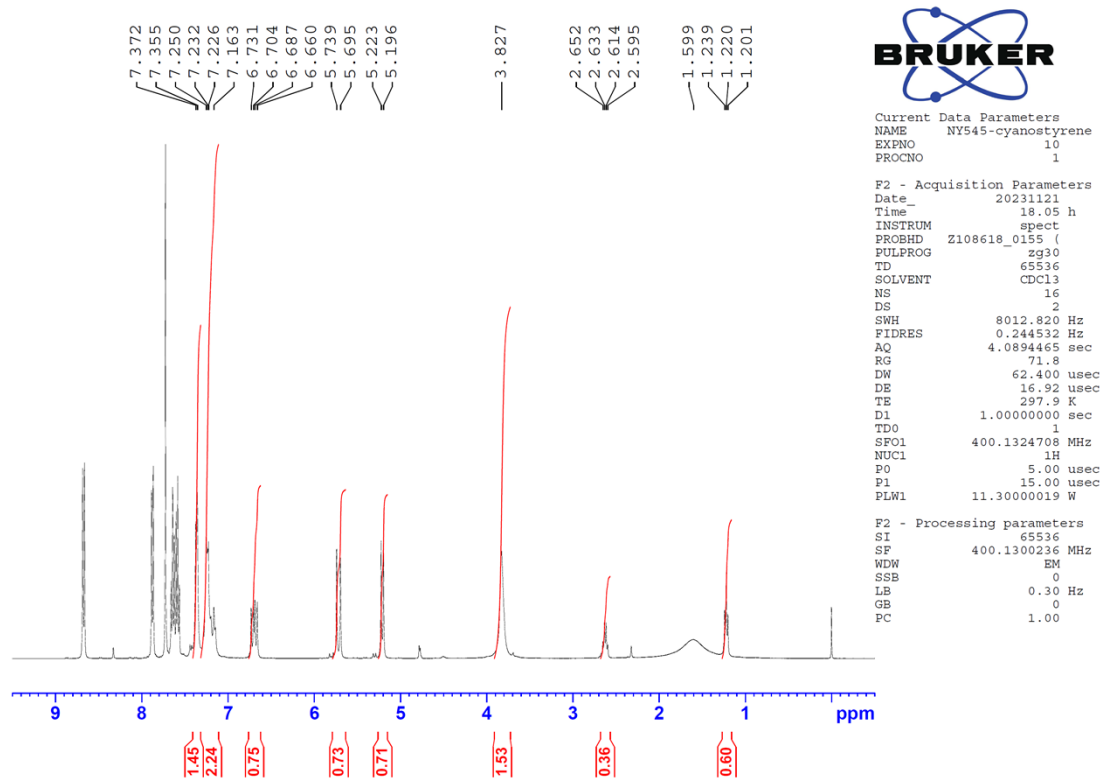

#### 4-Ethylbenzylamine

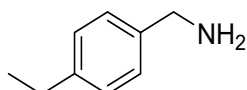

After the hydrogenation of 4-vinylbenzocnitrile over Raney Ni, the catalyst was separated by filtration. The crude product was obtained by evaporation and analyzed by NMR analysis with phenanthrene as an internal standard. Formation of the title compound was determined by GC-MS measurement.

$^1\text{H}$  NMR (400 MHz,  $\text{CDCl}_3$ ):  $\delta = 7.19$ – $7.16$  (m, 4H),  $4.00$  (br s, 2H),  $2.63$  (q,  $J = 7.5$  Hz, 2H),  $1.22$  (t,  $J = 7.6$  Hz, 3H).

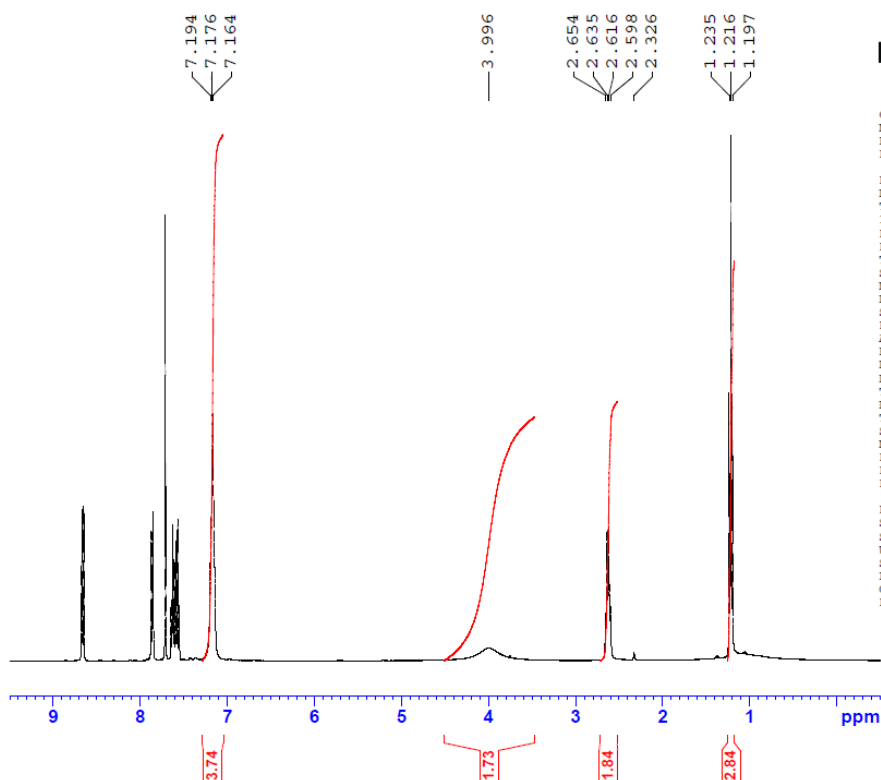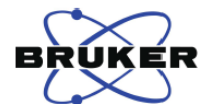

```

Current Data Parameters
NAME      NY549_Ni_cyaostyrene
EXPNO    10
PROCNO   1

F2 - Acquisition Parameters
Date_    20231206
Time     11.18 h
INSTRUM  spect
PROBHD   Z108618_0155 (
PULPROG  zg30
TD       65536
SOLVENT  CDCl3
NS       16
DS       2
SWH      8012.820 Hz
FIDRES   0.244532 Hz
AQ       4.0894465 sec
RG       32
DW       62.400 usec
DE       16.92 usec
TE       297.8 K
D1       1.00000000 sec
TDO      1
SFO1     400.1324708 MHz
NUC1     1H
PC       5.00 usec
P1       15.00 usec
PLW1     11.30000019 W

F2 - Processing parameters
SI       65536
SF       400.1300359 MHz
WDW      EM
SSB      0
LB       0.30 Hz
GB       0
PC       1.00
  
```

#### 4-Nitrobenzyl alcohol

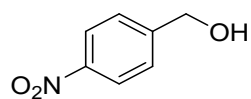

After the reaction, chlorobenzene was added to the reaction mixture as an external standard, and analyzed by GC measurement. Formation of the title compound was determined by GC-MS measurement.

## 7. NMR spectra

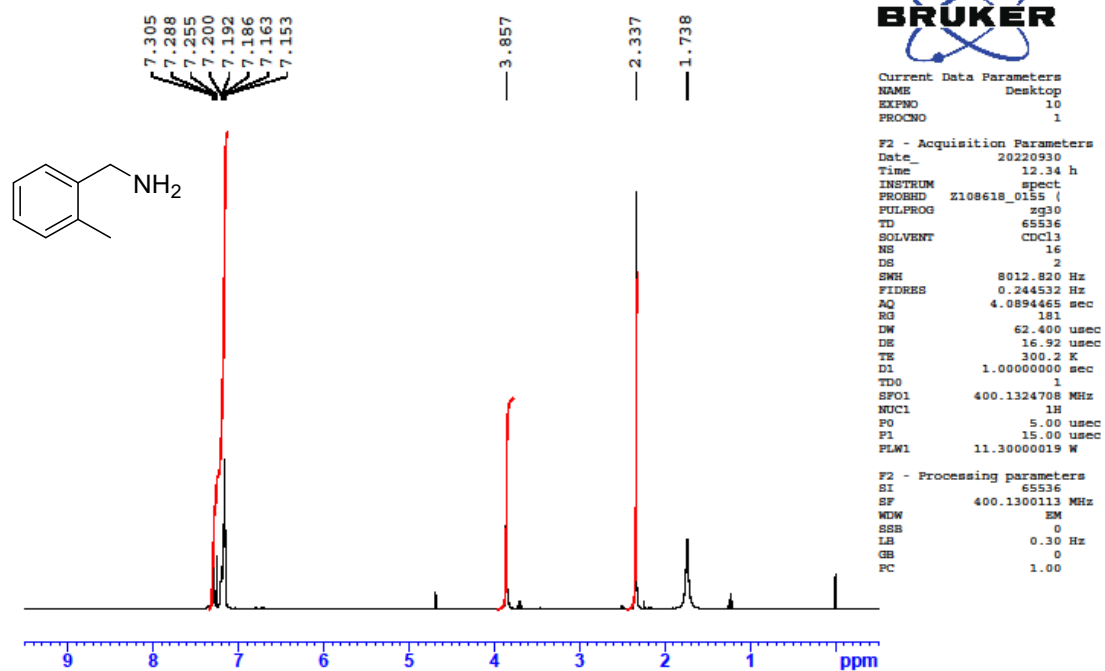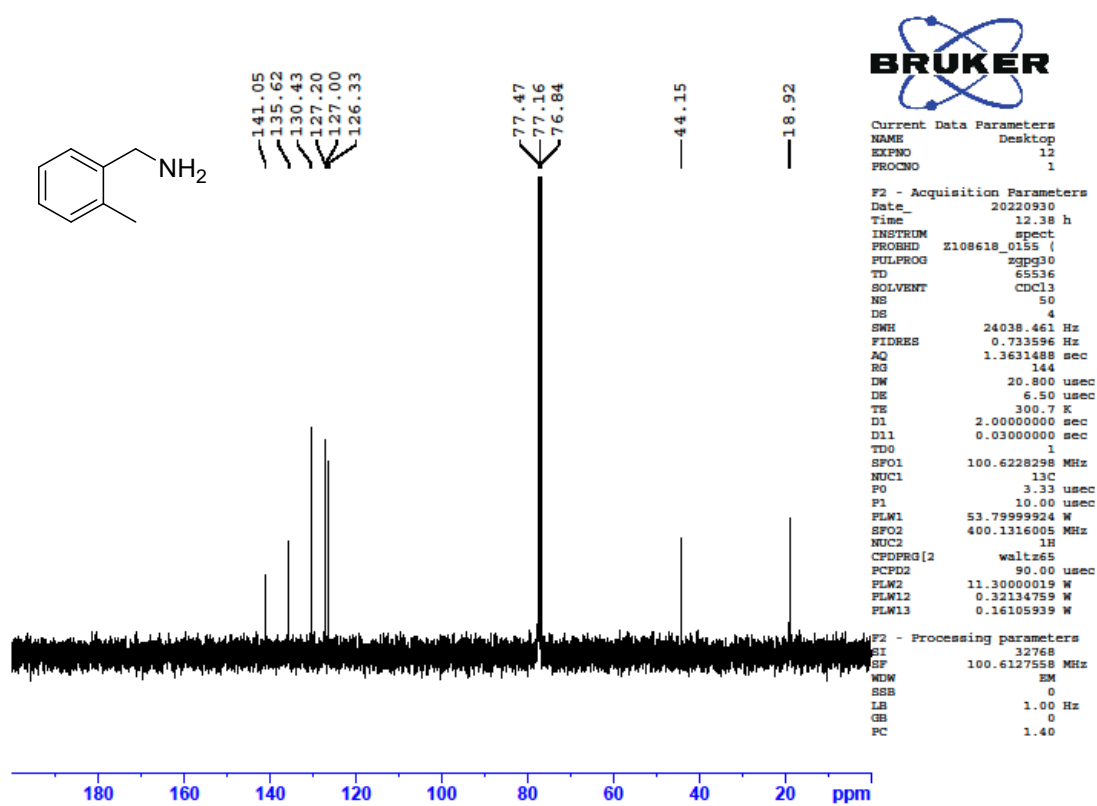

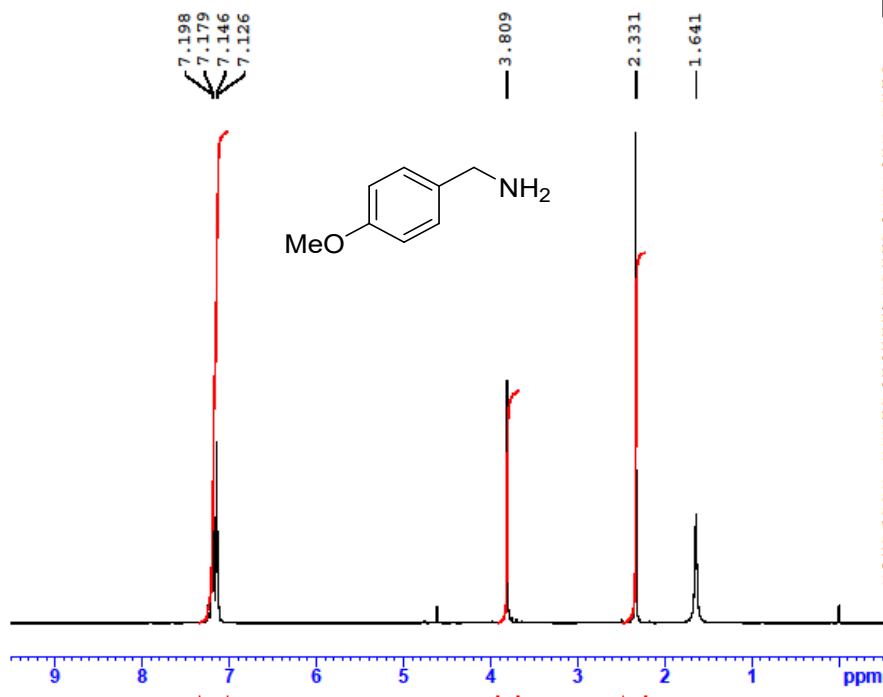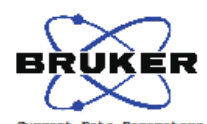

Current Data Parameters  
 NAME Desktop  
 EXPNO 10  
 PROCNO 1

F2 - Acquisition Parameters  
 Date\_ 20221006  
 Time 16.04 h  
 INSTRUM spect  
 PROBHD Z108618\_0155 ( )  
 PULPROG zg30  
 TD 65536  
 SOLVENT CDCl3  
 NS 16  
 DS 2  
 SWH 8012.820 Hz  
 FIDRES 0.244532 Hz  
 AQ 4.0894465 sec  
 RG 80.6  
 DW 62.400 usec  
 DE 16.92 usec  
 TE 298.6 K  
 D1 1.00000000 sec  
 TD0 1  
 SFO1 400.1324708 MHz  
 NUC1 1H  
 FO 5.00 usec  
 FI 15.00 usec  
 FLW1 11.30000019 W

F2 - Processing parameters  
 SI 65536  
 SF 400.1300134 MHz  
 WDW EM  
 SSB 0  
 LB 0.30 Hz  
 GB 0  
 PC 1.00

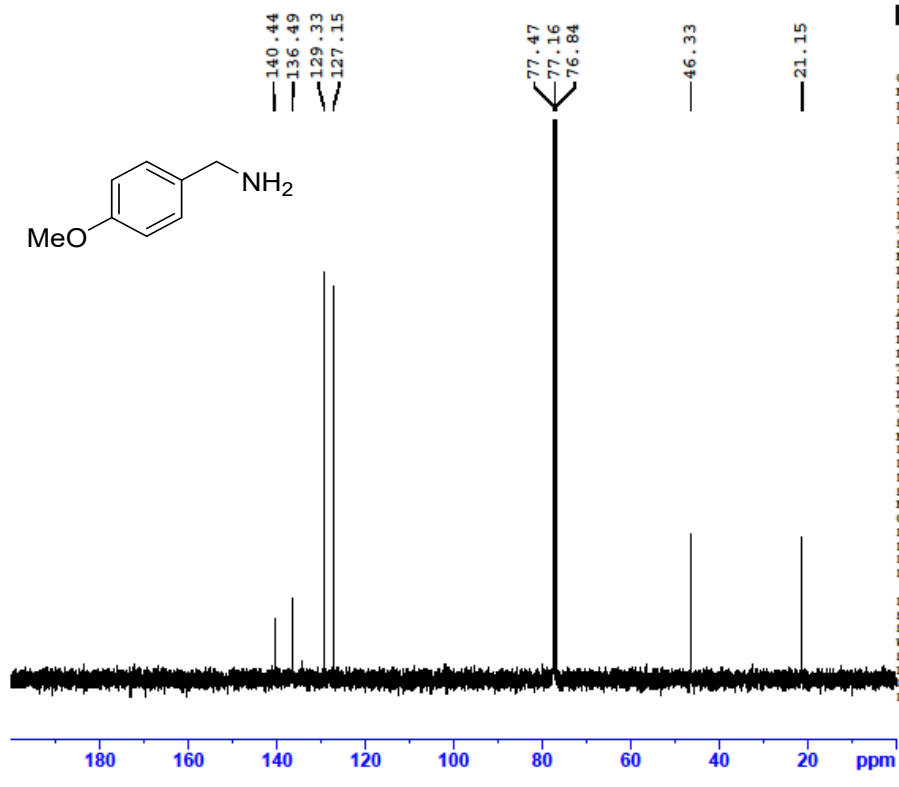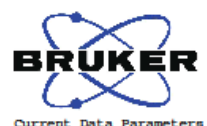

Current Data Parameters  
 NAME Desktop  
 EXPNO 11  
 PROCNO 1

F2 - Acquisition Parameters  
 Date\_ 20221006  
 Time 9.51 h  
 INSTRUM spect  
 PROBHD Z108618\_0155 ( )  
 PULPROG zgpg30  
 TD 65536  
 SOLVENT CDCl3  
 NS 50  
 DS 4  
 SWH 24038.461 Hz  
 FIDRES 0.733596 Hz  
 AQ 1.3631488 sec  
 RG 144  
 DW 20.800 usec  
 DE 6.50 usec  
 TE 299.1 K  
 D1 2.00000000 sec  
 D11 0.03000000 sec  
 TD0 1  
 SFO1 100.6228298 MHz  
 NUC1 13C  
 FO 3.33 usec  
 FI 10.00 usec  
 FLW1 53.79999924 W  
 SFO2 400.1316005 MHz  
 NUC2 1H  
 CPDPRG[2] waltz65  
 PCPD2 90.00 usec  
 FLW2 11.30000019 W  
 FLW12 0.32134759 W  
 FLW13 0.16105939 W

F2 - Processing parameters  
 SI 32768  
 SF 100.6127580 MHz  
 WDW EM  
 SSB 0  
 LB 1.00 Hz  
 GB 0  
 PC 1.40

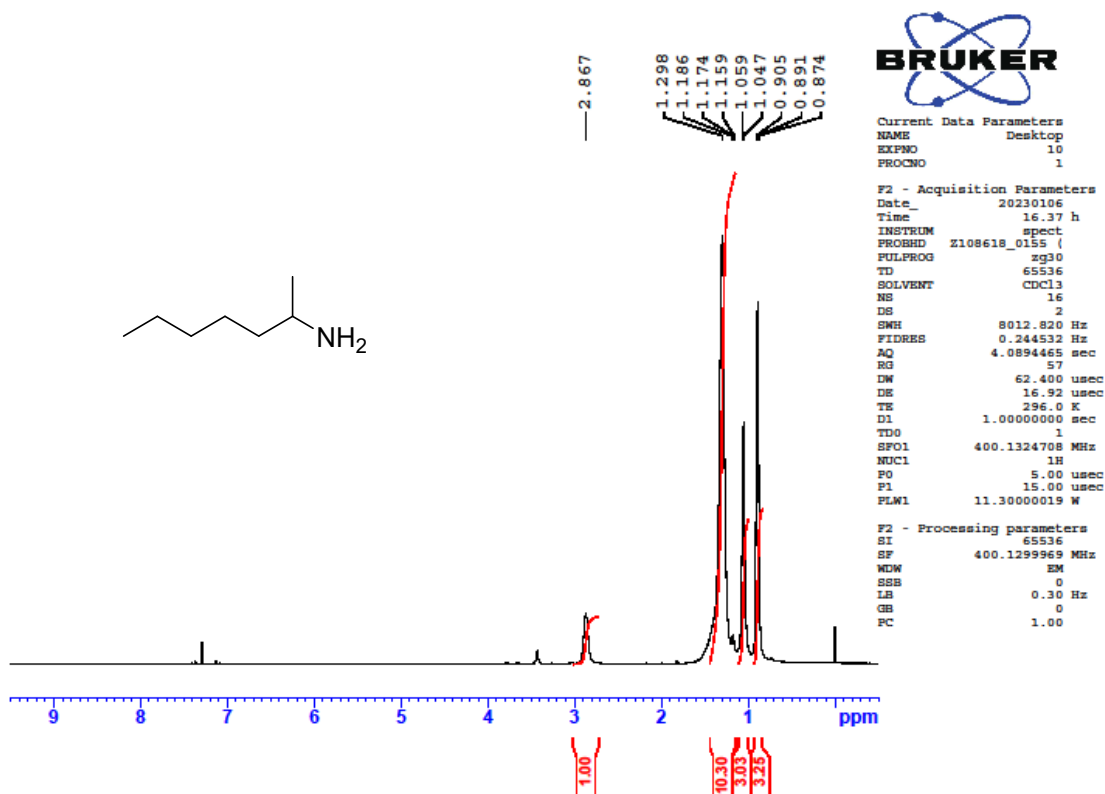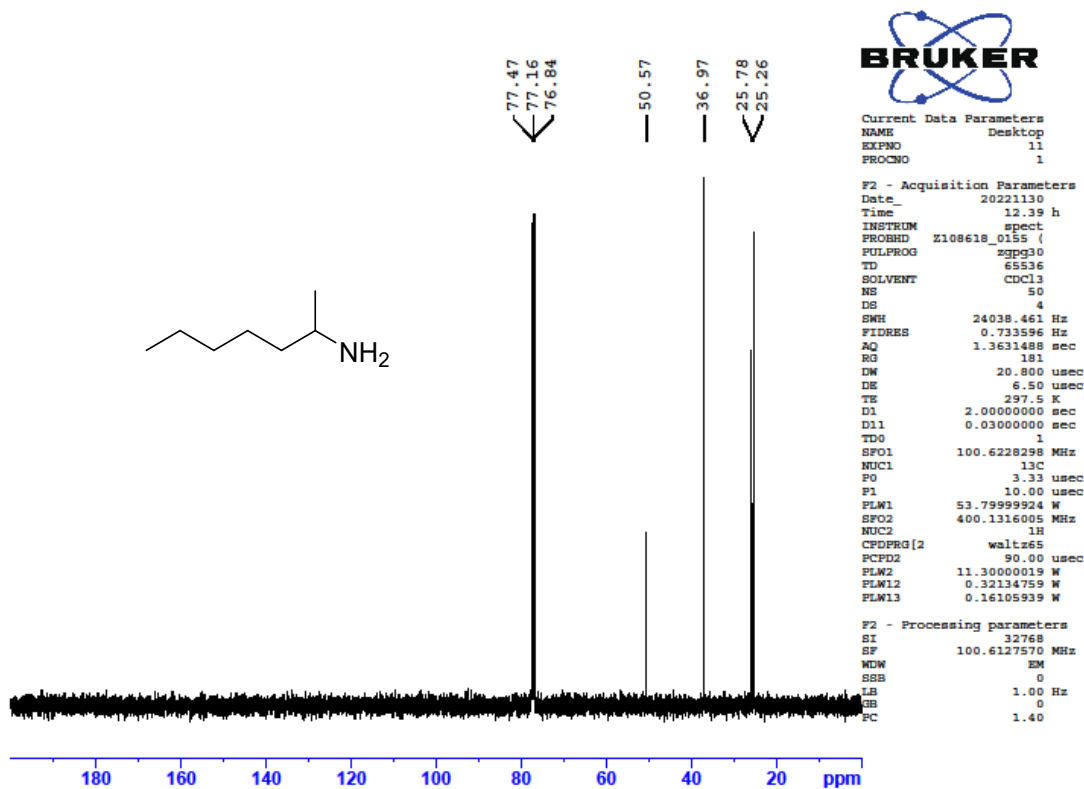

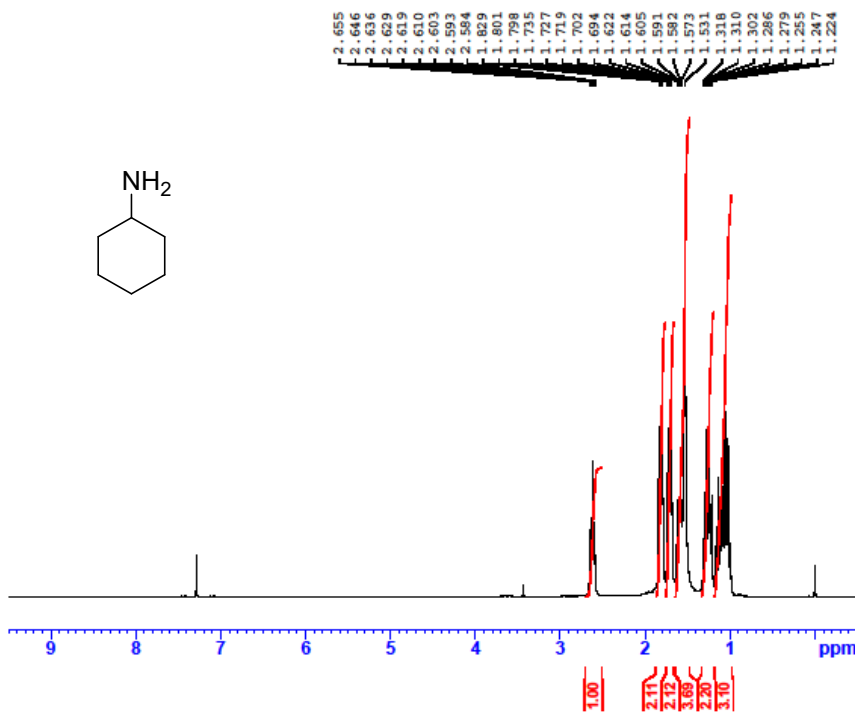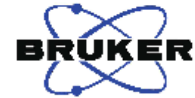

Current Data Parameters  
 NAME Desktop  
 EXPNO 10  
 PROCNO 1

F2 - Acquisition Parameters  
 Date\_ 20221130  
 Time 12.36 h  
 INSTRUM spect  
 PROBHD Z108618\_0155 ( )  
 PULPROG zg30  
 TD 65536  
 SOLVENT CDCl3  
 NS 16  
 DS 2  
 SWH 8012.820 Hz  
 FIDRES 0.244532 Hz  
 AQ 4.0894465 sec  
 RG 90.5  
 DW 62.400 usec  
 DE 16.92 usec  
 TE 296.9 K  
 D1 1.00000000 sec  
 TDO 1  
 SFO1 400.1324708 MHz  
 NUC1 1H  
 PO 5.00 usec  
 P1 15.00 usec  
 PLW1 11.30000019 W

F2 - Processing parameters  
 SI 65536  
 SF 400.1299996 MHz  
 WDW EM  
 SSB 0  
 LB 0.30 Hz  
 GB 0  
 PC 1.00

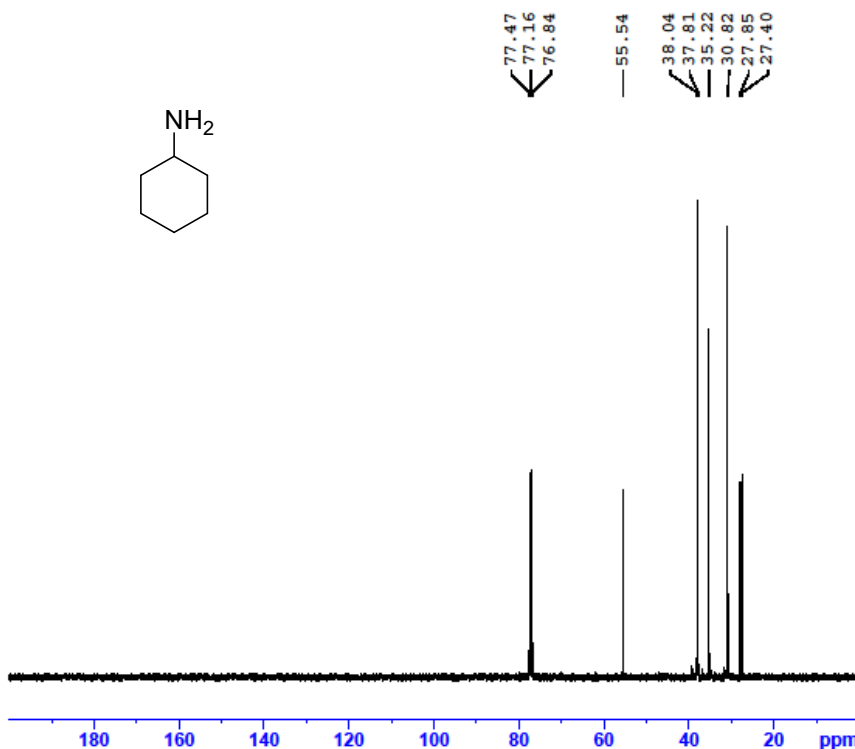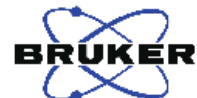

Current Data Parameters  
 NAME NYS15-admantanone-2  
 EXPNO 11  
 PROCNO 1

F2 - Acquisition Parameters  
 Date\_ 20230922  
 Time 17.04 h  
 INSTRUM spect  
 PROBHD Z108618\_0155 ( )  
 PULPROG zgpg30  
 TD 65536  
 SOLVENT CDCl3  
 NS 50  
 DS 4  
 SWH 24038.461 Hz  
 FIDRES 0.733596 Hz  
 AQ 1.3631488 sec  
 RG 203  
 DW 20.800 usec  
 DE 6.50 usec  
 TE 304.3 K  
 D1 2.00000000 sec  
 D11 0.03000000 sec  
 TDO 1  
 SFO1 100.6228298 MHz  
 NUC1 13C  
 PO 3.33 usec  
 P1 10.00 usec  
 PLW1 53.79999924 W  
 SFO2 400.1316005 MHz  
 NUC2 1H  
 CPDPRG2 waltz65  
 PCPD2 90.00 usec  
 PLW2 11.30000019 W  
 PLW12 0.32134759 W  
 PLW13 0.16105939 W

F2 - Processing parameters  
 SI 32768  
 SF 100.6127605 MHz  
 WDW EM  
 SSB 0  
 LB 1.00 Hz  
 GB 0  
 PC 1.40

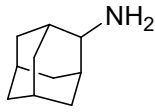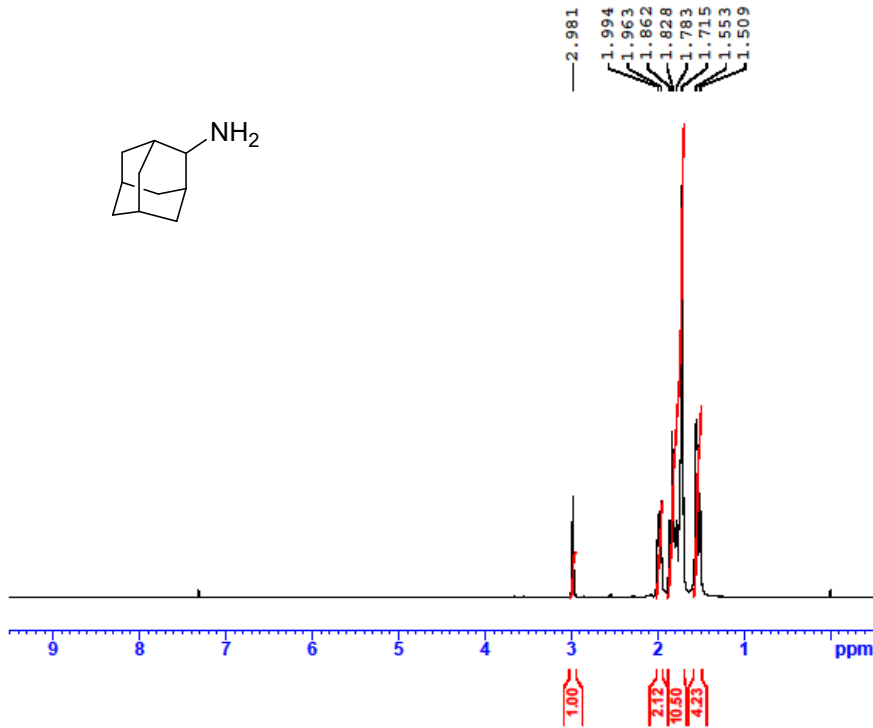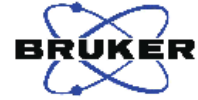

Current Data Parameters  
 NAME NYS15-adamantanone-2  
 EXPNO 10  
 PROCNO 1

F2 - Acquisition Parameters  
 Date\_ 20230922  
 Time\_ 16.50 h  
 INSTRUM spect  
 PROBHD Z108618\_0155 (  
 PULPROG zg30  
 TD 65536  
 SOLVENT cdcl3  
 NS 16  
 DS 2  
 SWH 8012.820 Hz  
 FIDRES 0.244532 Hz  
 AQ 4.0894465 sec  
 RG 32  
 DW 62.400 usec  
 DE 16.92 usec  
 TE 303.8 K  
 D1 1.00000000 sec  
 TDO 1  
 SFO1 400.1324708 MHz  
 NUC1 1H  
 P0 5.00 usec  
 P1 15.00 usec  
 PLW1 11.30000019 W

F2 - Processing parameters  
 SI 65536  
 SF 400.1299883 MHz  
 WDW EM  
 SSB 0  
 LB 0.30 Hz  
 GB 0  
 PC 1.00

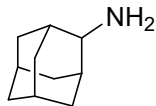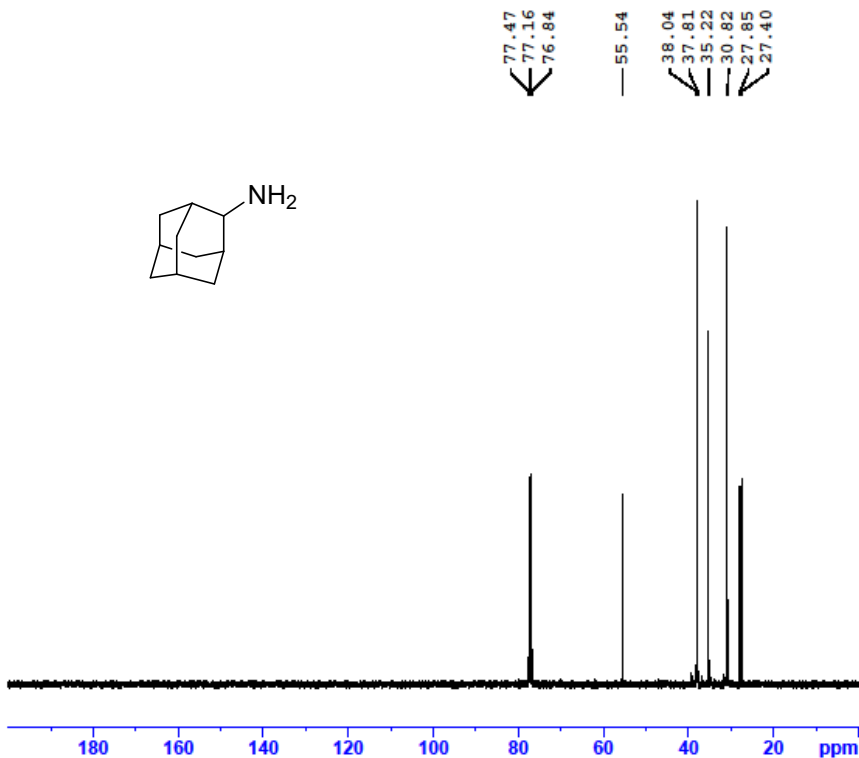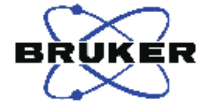

Current Data Parameters  
 NAME NYS15-adamantanone-2  
 EXPNO 11  
 PROCNO 1

F2 - Acquisition Parameters  
 Date\_ 20230922  
 Time\_ 17.04 h  
 INSTRUM spect  
 PROBHD Z108618\_0155 (  
 PULPROG zgpg30  
 TD 65536  
 SOLVENT CDCl3  
 NS 50  
 DS 4  
 SWH 24038.461 Hz  
 FIDRES 0.733596 Hz  
 AQ 1.3631488 sec  
 RG 203  
 DW 20.800 usec  
 DE 6.50 usec  
 TE 304.3 K  
 D1 2.00000000 sec  
 D11 0.03000000 sec  
 TDO 1  
 SFO1 100.6228298 MHz  
 NUC1 13C  
 P0 3.33 usec  
 P1 10.00 usec  
 PLW1 53.79999924 W  
 SFO2 400.1316005 MHz  
 NUC2 1H  
 CPDPRG2 waltz16  
 PCPD2 90.00 usec  
 PLW2 11.30000019 W  
 PLW12 0.32134759 W  
 PLW13 0.16105939 W

F2 - Processing parameters  
 SI 32768  
 SF 100.6127605 MHz  
 WDW EM  
 SSB 0  
 LB 1.00 Hz  
 GB 0  
 PC 1.40

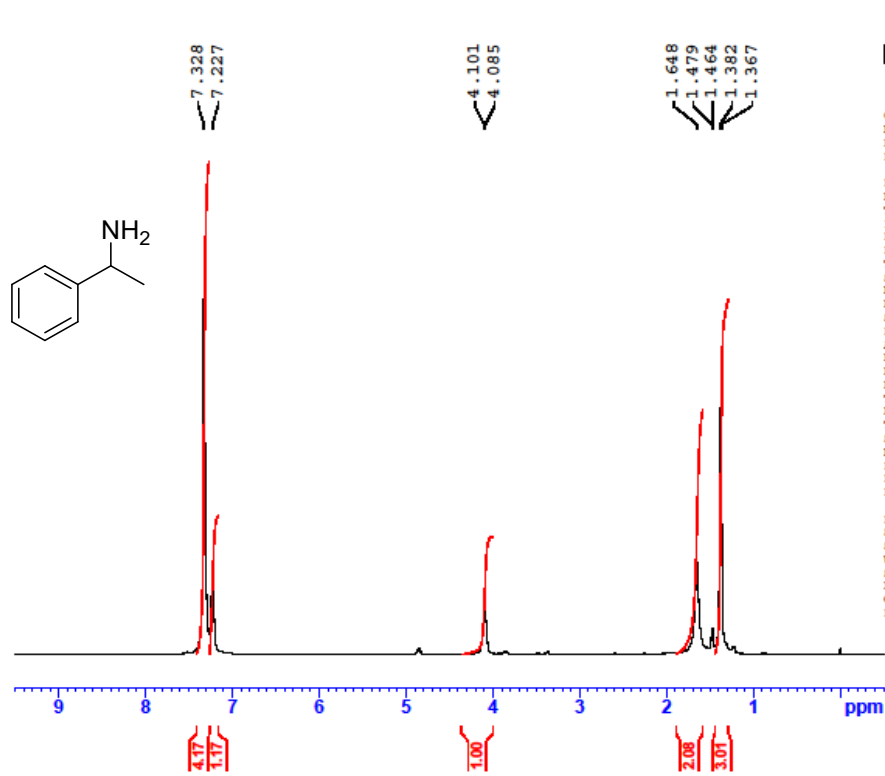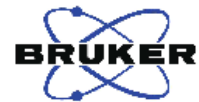

Current Data Parameters  
 NAME Desktop  
 EXPNO 10  
 PROCNO 1

F2 - Acquisition Parameters  
 Date\_ 20230118  
 Time 9.45 h  
 INSTRUM spect  
 PROBHD Z108618\_0155 ( )  
 FULPROG zg30  
 TD 65536  
 SOLVENT CDCl3  
 NS 16  
 DS 2  
 SMH 8012.820 Hz  
 FIDRES 0.244532 Hz  
 AQ 4.0894465 sec  
 RG 32  
 DW 62.400 usec  
 DE 16.92 usec  
 TE 296.0 K  
 D1 1.00000000 sec  
 TD0 1  
 SFO1 400.1324708 MHz  
 NUC1 1H  
 PO 5.00 usec  
 P1 15.00 usec  
 PLW1 11.30000019 W

F2 - Processing parameters  
 SI 65536  
 SF 400.1300154 MHz  
 NDMW EM  
 SBB 0  
 LB 0.30 Hz  
 GB 0  
 PC 1.00

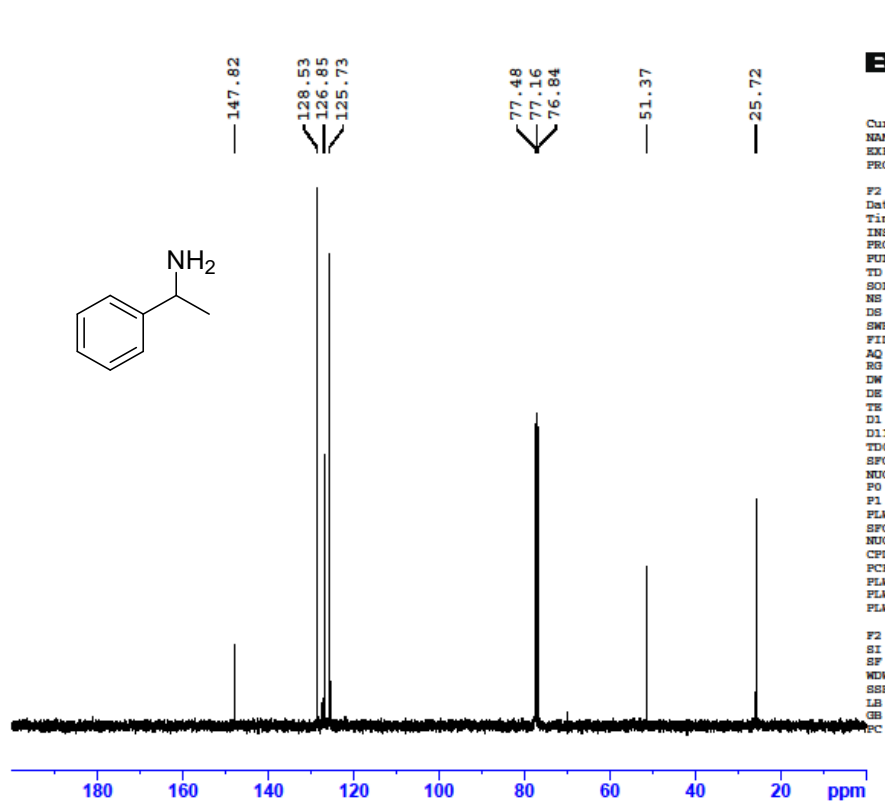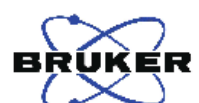

Current Data Parameters  
 NAME Desktop  
 EXPNO 11  
 PROCNO 1

F2 - Acquisition Parameters  
 Date\_ 20230118  
 Time 9.49 h  
 INSTRUM spect  
 PROBHD Z108618\_0155 ( )  
 FULPROG zgpg30  
 TD 65536  
 SOLVENT CDCl3  
 NS 50  
 DS 4  
 SMH 24038.461 Hz  
 FIDRES 0.733596 Hz  
 AQ 1.3631488 sec  
 RG 203  
 DW 20.800 usec  
 DE 6.50 usec  
 TE 296.6 K  
 D1 2.00000000 sec  
 D11 0.03000000 sec  
 TD0 1  
 SFO1 100.6228298 MHz  
 NUC1 13C  
 PO 3.33 usec  
 P1 10.00 usec  
 PLW1 53.79999924 W  
 SFO2 400.1316005 MHz  
 NUC2 1H  
 CPDPRG[2] waltz65  
 PCPD2 90.00 usec  
 PLW2 11.30000019 W  
 PLW12 0.32134759 W  
 PLW13 0.16105939 W

F2 - Processing parameters  
 SI 32768  
 SF 100.6127660 MHz  
 NDMW EM  
 SBB 0  
 LB 1.00 Hz  
 GB 0  
 PC 1.40



## 8. Additional tables and figures

**Table S1** Reported Fe catalysts for reductive amination using H<sub>2</sub>

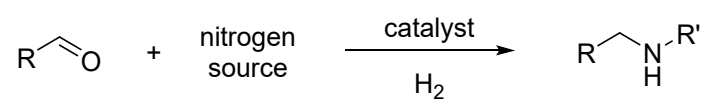

| catalyst                               | Fe loading (mol%) | R                                                                                 | Nitrogen source         | $p\text{H}_2$ (MPa) | Temp. (°C) | Reaction time (h) | Yield (%) | ref       |
|----------------------------------------|-------------------|-----------------------------------------------------------------------------------|-------------------------|---------------------|------------|-------------------|-----------|-----------|
| Fe <sub>2</sub> O <sub>3</sub> /NGr @C | 5                 | Phenyl                                                                            | NH <sub>3</sub> aq.     | 7                   | 170        | 30                | 85        | S9        |
| Fe(N)SiC                               | 10                | Phenyl                                                                            | PhNO <sub>2</sub>       | 6.5                 | 130        | 20                | 89        | S10       |
| Fe-P <sub>900</sub> -PCC               | 0.025             | 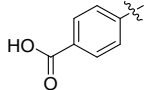 | NH <sub>3</sub> aq.     | 6                   | 75         | 30                | 98        | S11       |
| Fe-P <sub>900</sub> -PCC               | 0.025             | Phenyl                                                                            | MeNH <sub>2</sub>       | 6                   | 120        | 4                 | 98        | S11       |
| Fe@HC <sub>700</sub>                   | 2.3               | Phenyl                                                                            | NH <sub>3</sub> in MeOH | 2                   | 110        | 4                 | 92        | S12       |
| Fe-C/MgO                               | 12                | Phenyl                                                                            | NH <sub>3</sub>         | 1.5                 | 80         | 20                | 99        | This work |

**Table S2** Reductive amination of **1a** over Fe/support\_im<sup>a</sup>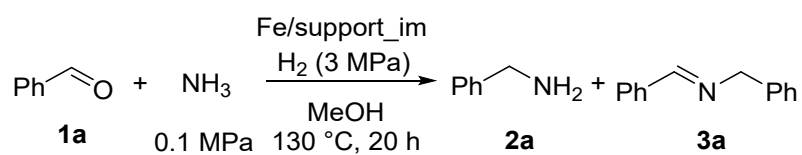

| Entry | Support                        | Crystallite size (nm) | S <sub>BET</sub> (m <sup>2</sup> g <sup>-1</sup> ) | Conv. (%) | Yield (%) |           |
|-------|--------------------------------|-----------------------|----------------------------------------------------|-----------|-----------|-----------|
|       |                                |                       |                                                    |           | <b>2a</b> | <b>3a</b> |
| 1     | SiO <sub>2</sub>               | 17                    | 195                                                | 99        | 0         | 72        |
| 2     | TiO <sub>2</sub>               | 43                    | 19                                                 | 92        | 2         | 32        |
| 3     | Nb <sub>2</sub> O <sub>5</sub> | 34                    | -                                                  | >99       | 33        | 24        |
| 4     | Al <sub>2</sub> O <sub>3</sub> | 22                    | 178                                                | 94        | 1         | 26        |
| 5     | ZrO <sub>2</sub>               | 34                    | 37                                                 | >99       | 51        | 31        |
| 6     | MgO                            | 25                    | 29                                                 | >99       | 56        | 28        |

<sup>a</sup> Reaction conditions: Fe/support\_im (0.02 g), **1a** (0.5 mmol), MeOH (5 mL), *p*NH<sub>3</sub> (0.1 MPa), *p*H<sub>2</sub> (3 MPa), 20 h. Conversion and yield were determined by GC analysis.

**Table S3** Effects of reduction temperature over Fe-C/MgO<sup>a</sup>

$$\begin{array}{c}
 \text{Ph}-\text{CHO} + \text{NH}_3 \xrightarrow[\text{MeOH}]{\text{Fe-C/MgO, H}_2 (1.5 \text{ MPa})} \text{Ph}-\text{CH}_2\text{NH}_2 + \text{Ph}-\text{CH}=\text{N}-\text{CH}_2\text{Ph} \\
 \text{1a} \quad 0.1 \text{ MPa} \quad 80 \text{ }^\circ\text{C, 20 h} \quad \text{2a} \quad \text{3a}
 \end{array}$$

| Entry          | Reduction temp. (°C) | S <sub>BET</sub> (m <sup>2</sup> /g) | Crystallite size (nm) |     | Conv. (%) | Yield (%) |    |
|----------------|----------------------|--------------------------------------|-----------------------|-----|-----------|-----------|----|
|                |                      |                                      | Fe                    | MgO |           | 2a        | 3a |
| 1              | 650                  | 100                                  | 7                     | 9.5 | >99       | 99        | -  |
| 2 <sup>b</sup> | 650                  | 98                                   | 7                     | 9.5 | >99       | 88        | 3  |
| 2              | 600                  | 119                                  | -                     | 7.8 | >99       | 97        | 4  |
| 3              | 550                  | 142                                  | -                     | 6.2 | >99       | 59        | 24 |
| 4              | 500                  | 168                                  | -                     | 5.5 | 96        | -         | 17 |

<sup>a</sup> Reaction conditions: Fe-C/MgO\* (citric acid/Fe = 2.5, 0.02 g), **1a** (0.5 mmol), MeOH (5 mL), *p*NH<sub>3</sub> (0.1 MPa), *p*H<sub>2</sub> (1.5 MPa), 80 °C, 20 h. Conversion and yield were determined by GC analysis. <sup>b</sup> Catalyst was prepared by the reduction of MgFe-LDH in H<sub>2</sub> flow (30 mL/min). \* Catalysts were prepared by the reduction of MgFe-LDH-citrate in H<sub>2</sub> flow (100 mL/min).

**Table S4** Effects of Fe loading in Fe/MgO<sub>im</sub> on reductive amination of **1a**<sup>a</sup>

$$\begin{array}{c}
 \text{Ph}-\text{CHO} + \text{NH}_3 \xrightarrow[\text{solvent}]{\text{Fe/MgO}_{im}, \text{H}_2 (3 \text{ MPa})} \text{Ph}-\text{CH}_2\text{NH}_2 + \text{Ph}-\text{CH}=\text{N}-\text{CH}_2\text{Ph} \\
 \text{1a} \quad 0.1 \text{ MPa} \quad 130 \text{ }^\circ\text{C, 20 h} \quad \text{2a} \quad \text{3a}
 \end{array}$$

| Entry | Catalyst         |                       |                     | Conv. (%) | Yield (%) |    |
|-------|------------------|-----------------------|---------------------|-----------|-----------|----|
|       | Fe loading (wt%) | Crystallite Size (nm) | Loading amount (mg) |           | 2a        | 3a |
| 1     | 1                | -                     | 20                  | 95        | 1         | 6  |
| 2     | 1                | -                     | 100                 | 98        | 2         | 19 |
| 3     | 5                | -                     | 20                  | >99       | 85        | <1 |
| 4     | 5                | -                     | 80                  | >99       | 79        | <1 |
| 5     | 10               | 16                    | 40                  | >99       | 86        | 1  |
| 6     | 20               | 21                    | 20                  | >99       | 68        | 17 |
| 7     | 30               | 43                    | 13                  | 94        | 0         | 6  |

<sup>a</sup> Reaction conditions: Fe/MgO-im, **1a** (0.5 mmol), MeOH (5 mL), *p*NH<sub>3</sub> (0.1 MPa), *p*H<sub>2</sub> (3 MPa), 130 °C, 20 h. Conversion and yield were determined by GC analysis

**Table S5** Optimization study<sup>a</sup>

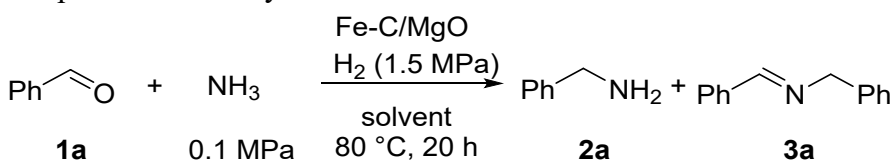

| Entry          | Catalyst amount (g) | Temp (°C) | Solvent        | H <sub>2</sub> (MPa) | NH <sub>3</sub> (MPa) | Conv . (%) | Yield (%) |       |
|----------------|---------------------|-----------|----------------|----------------------|-----------------------|------------|-----------|-------|
|                |                     |           |                |                      |                       |            | 2a        | 3a    |
| 1              | 0.02                | 60        | MeOH           | 1.0                  | 0.1                   | 98         | -         | 16    |
| 2              | 0.02                | 100       | MeOH           | 1.5                  | 0.1                   | >99        | 81        | 6     |
| 3 <sup>b</sup> | 0.015               | 110       | MeOH           | 2.0                  | 0.1                   | >99        | 88        | 8     |
| 4              | 0.02                | 80        | EtOH           | 1.5                  | 0.1                   | >99        | 50        | 22    |
| 5              | 0.02                | 80        | DMF            | 1.5                  | 0.1                   | 46         | 1         | 20    |
| 6              | 0.02                | 80        | THF            | 1.5                  | 0.1                   | 63         | 1         | 12    |
| 7              | 0.02                | 80        | cyclohexane    | 1.5                  | 0.1                   | 85         | 5         | 9     |
| 8              | 0.02                | 80        | toluene        | 1.5                  | 0.1                   | 73         | 2         | 6     |
| 9              | 0.02                | 80        | dichloroethane | 1.5                  | 0.1                   | 81         | -         | trace |
| 10             | 0.02                | 80        | MeOH           | 1.5                  | 0.3                   | >99        | 46        | 7     |
| 11             | 0.02                | 80        | MeOH           | 2.0                  | 0.3                   | >99        | 91        | 0     |
| 12             | 0.04                | 80        | MeOH           | 1.5                  | 0.1                   | >99        | 88        | 1     |
| 13             | 0.04                | 80        | MeOH           | 1.0                  | 0.1                   | >99        | 95        | 1     |
| 14             | 0.02                | 80        | MeOH           | 2.0                  | 0.1                   | >99        | 87        | 4     |

<sup>a</sup> Reaction conditions: Fe-C/MgO (0.02 g), **1a** (0.5 mmol), solvent (5 mL), *p*NH<sub>3</sub> (x MPa), *p*H<sub>2</sub> (y MPa), 80 °C, 20 h. Conversion and yield were determined by GC analysis.

<sup>b</sup> Run for 4 h.

**Table S6** Comparison of Fe-C/MgO and Fe/MgO on hydrogenation of **1a**<sup>a</sup>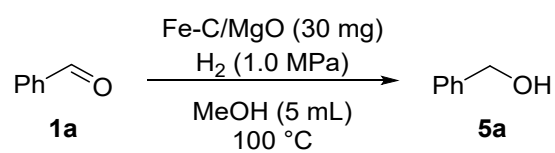

| Catalyst | Time (h) | Conv. (%) | Yield of <b>5a</b> (%) |
|----------|----------|-----------|------------------------|
| Fe-C/MgO | 1        | 77        | 77                     |
|          | 8        | 10        | 3                      |
| Fe/MgO   | 70       | 86        | 79                     |

<sup>a</sup> Reaction conditions: catalyst (0.03 g), **1a** (0.5 mmol), MeOH (5 mL),  $p\text{H}_2$  (1.0 MPa), 100 °C. Conversion and yield were determined by GC analysis.

**Table S7** Surface and bulk composition of Fe and Mg

| Catalyst | Precursor           | Surface composition (Fe/Mg) <sup>a</sup> | Bulk composition (Fe/Mg) <sup>b</sup> |
|----------|---------------------|------------------------------------------|---------------------------------------|
| Fe/MgO   | LDH-CO <sub>3</sub> | 1.3 / 98.7                               | 14.6 / 85.4                           |
| Fe-C/MgO | LDH-Citrate         | 1.5 / 98.5                               | 14.9 / 85.1                           |

<sup>a</sup> Determined by XPS measurements. <sup>b</sup> Determined by ICP-AES measurements.

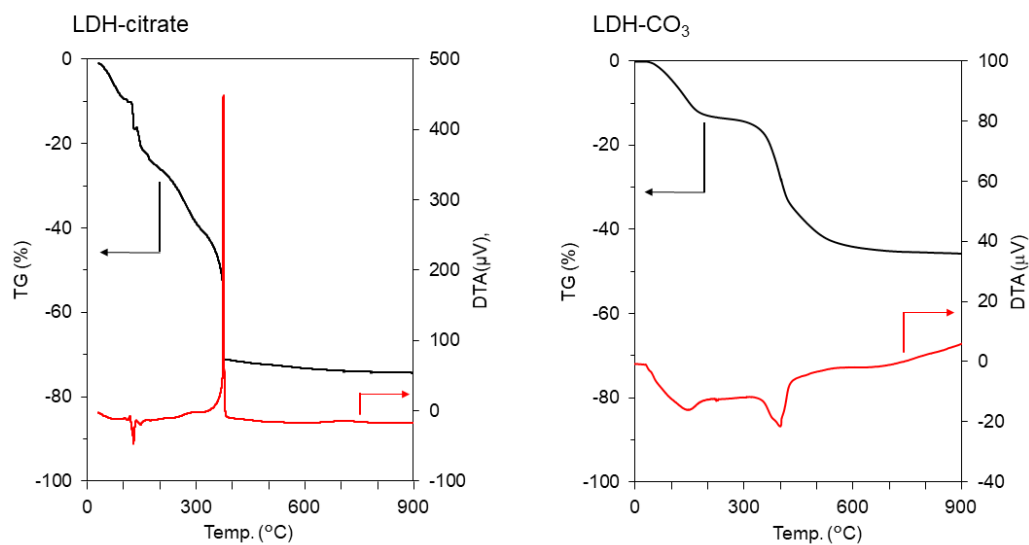

**Fig. S1** TG-DTA analysis for LDH-CO<sub>3</sub> and LDH-citrate

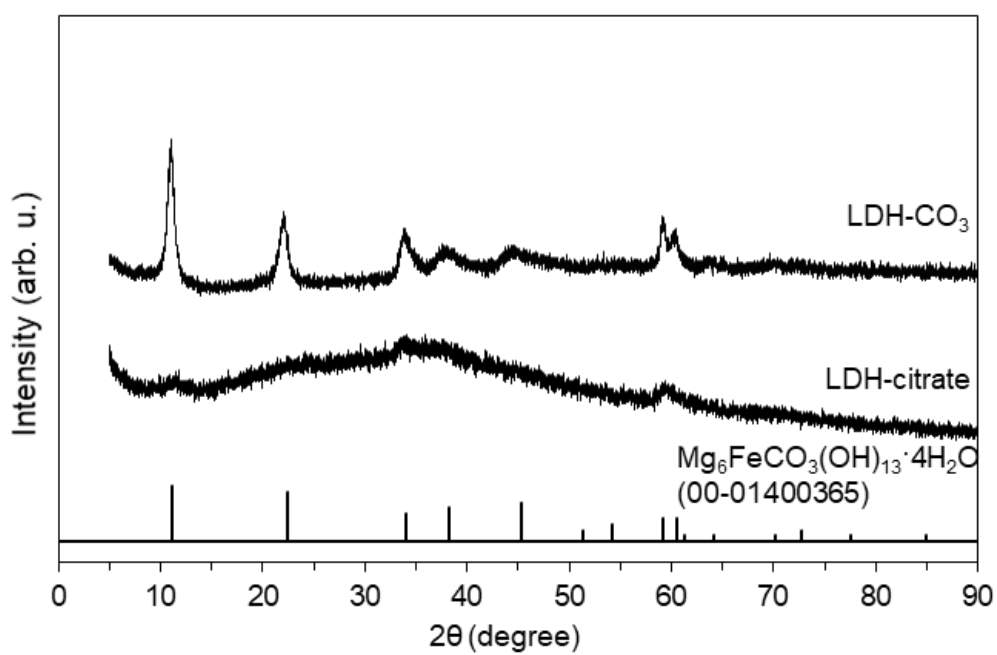

**Fig. S2** XRD patterns for LDH-CO<sub>3</sub> and LDH-citrate.

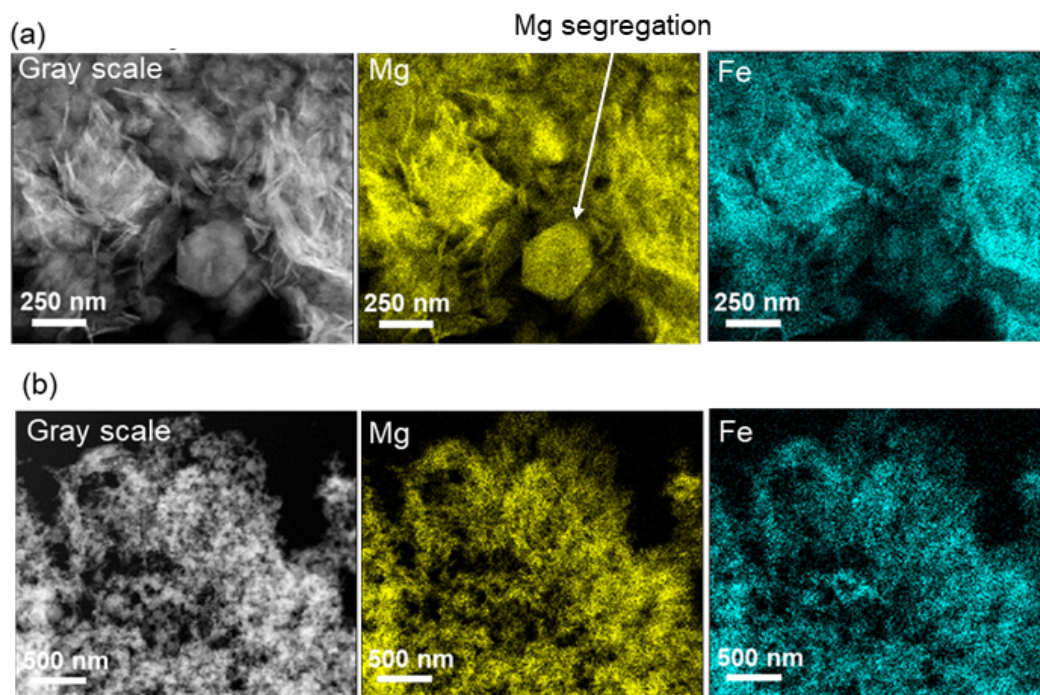

**Fig. S3** TEM-EDS mapping for (a) MgFe-LDH-CO<sub>3</sub> and (b) MgFe-LDH-citrate.

Since the Mg segregation disappeared with the introduction of citric acid, Mg species such as Mg(OH)<sub>2</sub> can be once dissolved in the solution and re-precipitated to be incorporated into the LDH layer during the introduction of citrate.

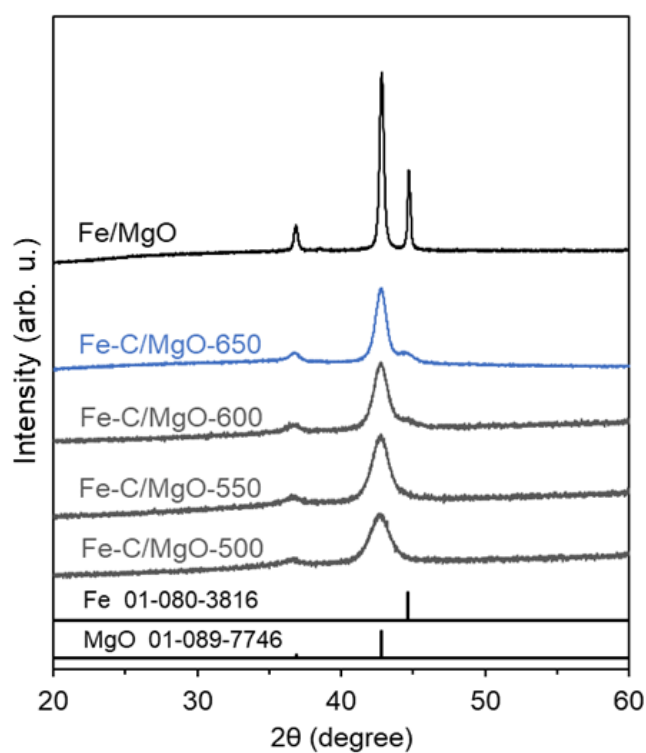

**Fig. S4** XRD patterns for Fe/MgO with different reduction temperature.

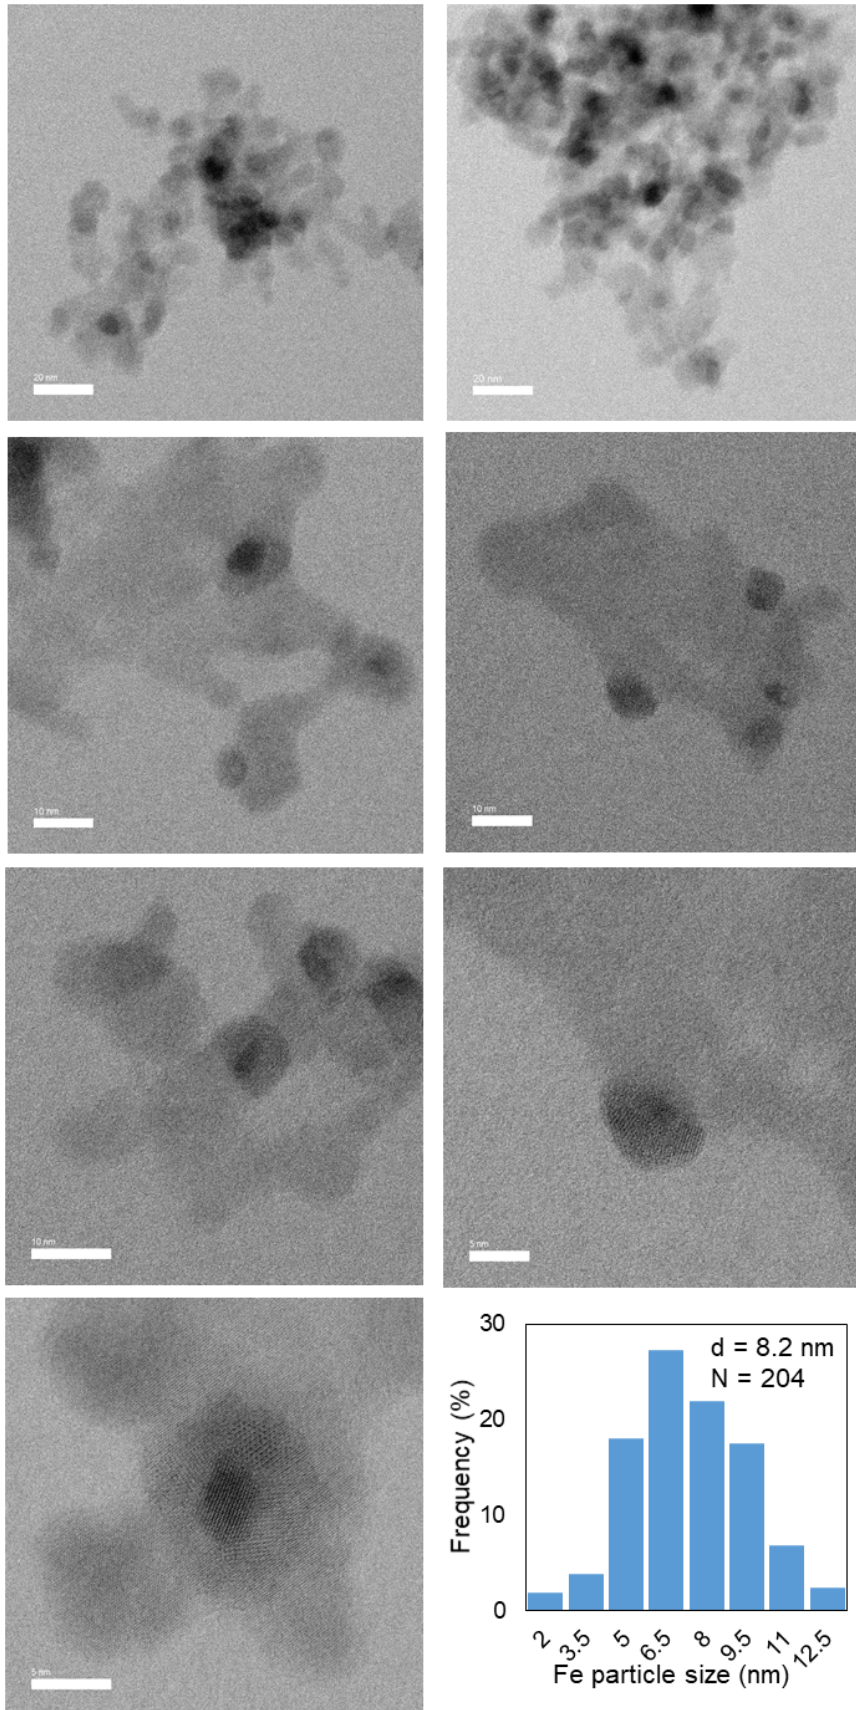

**Fig. S5** STEM images of Fe-C/MgO



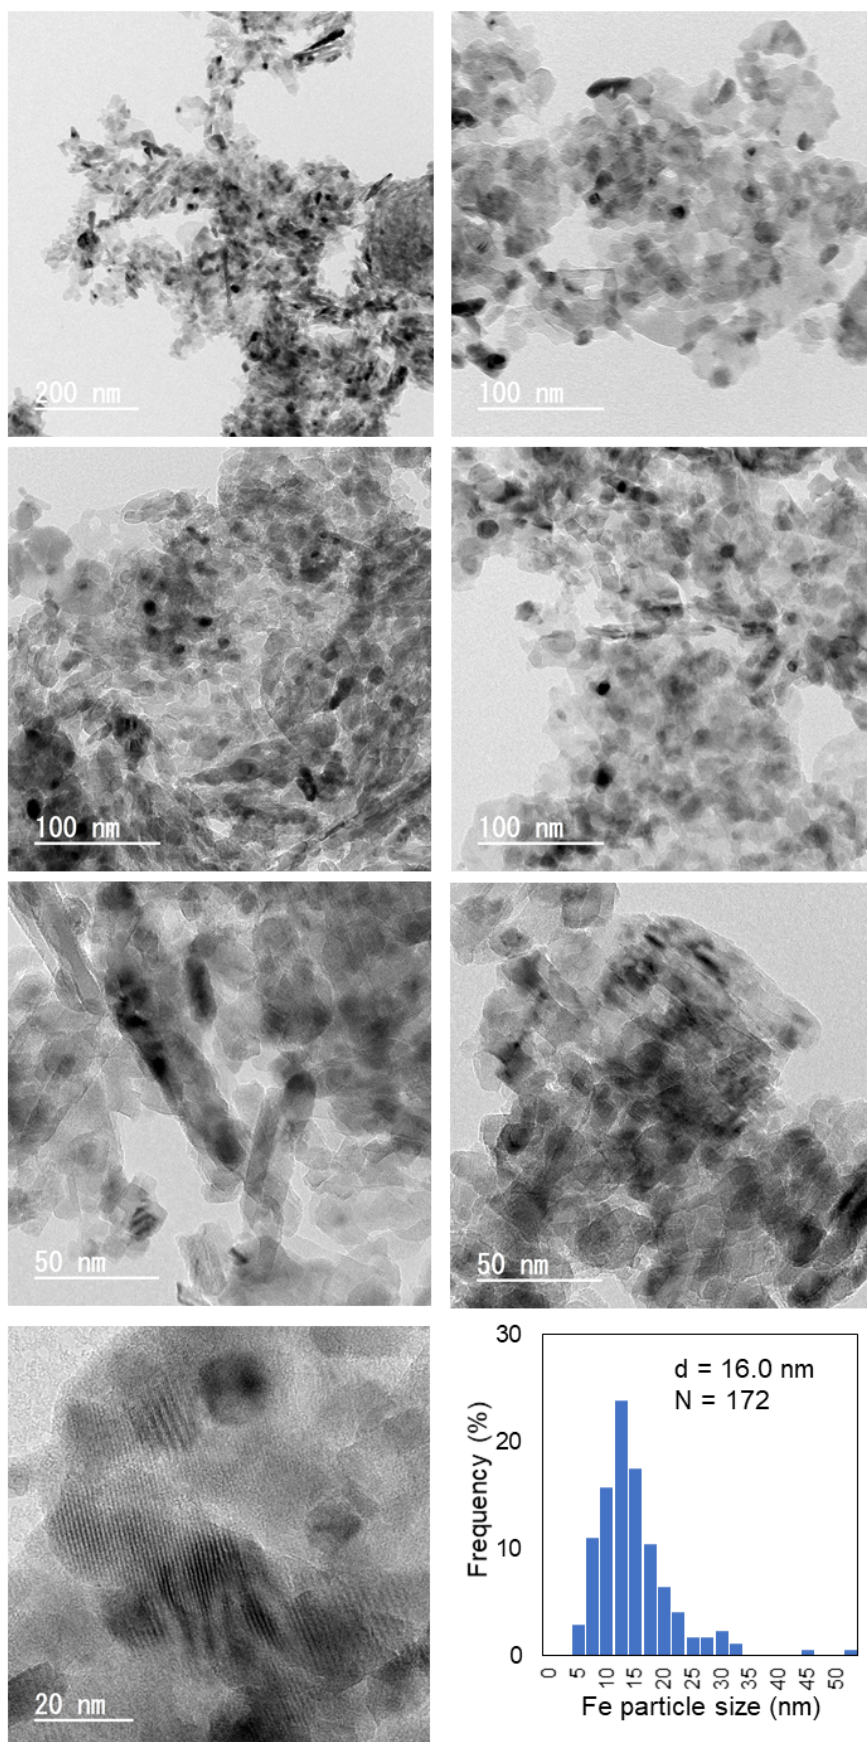

**Fig. S6** STEM images of Fe/MgO

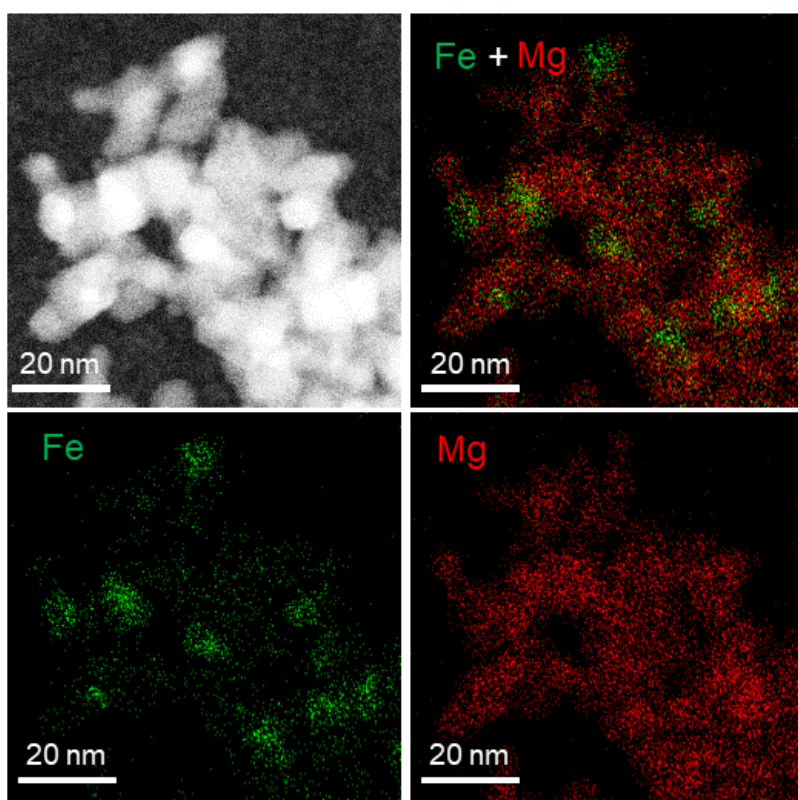

| Entry |        | Atomic ratio<br>Fe / Mg  |
|-------|--------|--------------------------|
| 1     | area A | 85 / 15                  |
| 2     | area B | 53 / 47                  |
| 3     | area C | 9 / 91                   |
| ..... |        |                          |
| 4     | total  | 14.6 / 85.4 <sup>a</sup> |

<sup>a</sup> Determined by ICP measurement.

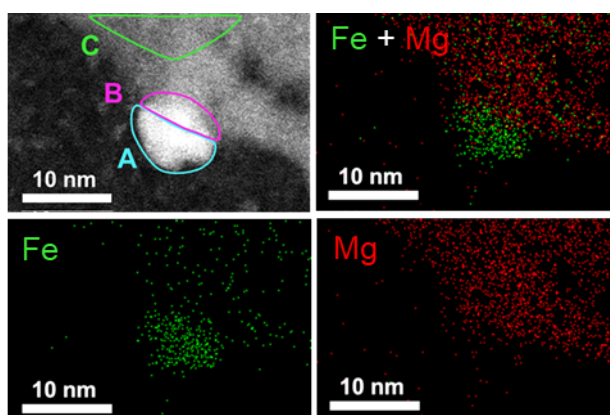

**Fig. S7** TEM-EDS mapping for Fe-C/MgO

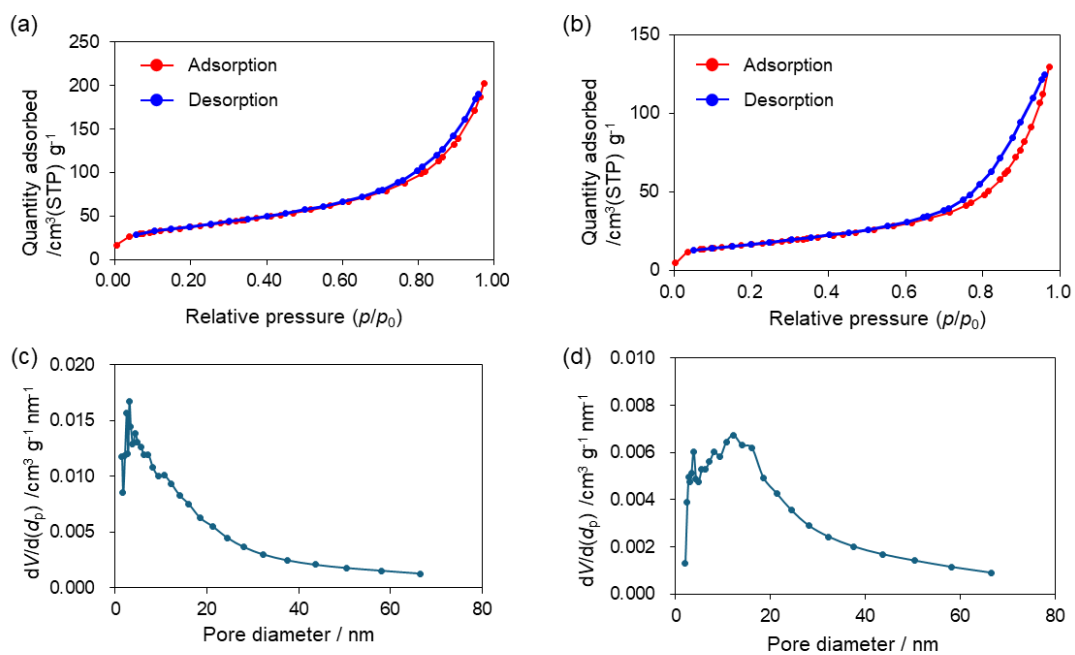

**Fig. S8** N<sub>2</sub> sorption isotherm of (a) Fe-C/MgO and (b) Fe/MgO and BJH pore size distribution plot of (c) Fe-C/MgO and (d) Fe/MgO

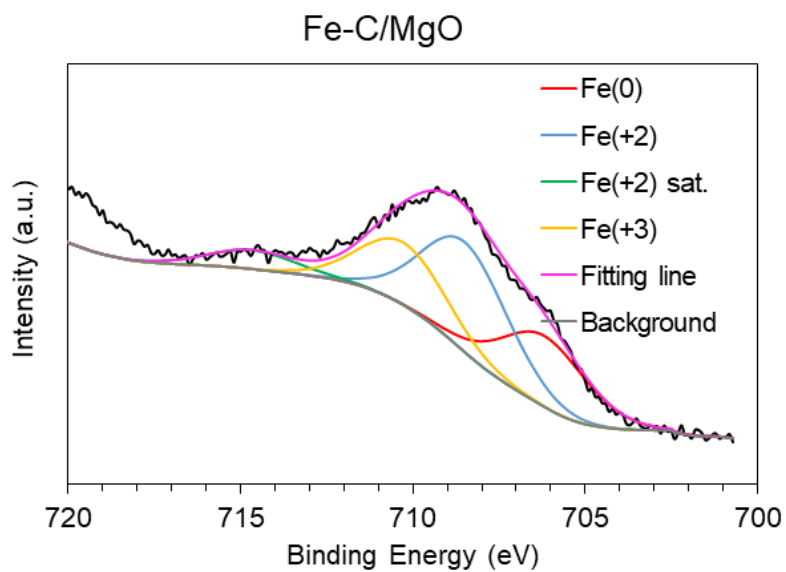

Relative ratio (%)  
 $\text{Fe}^0 : \text{Fe}^{2+} : \text{Fe}^{3+} = 29.1 : 45.1 : 25.7$

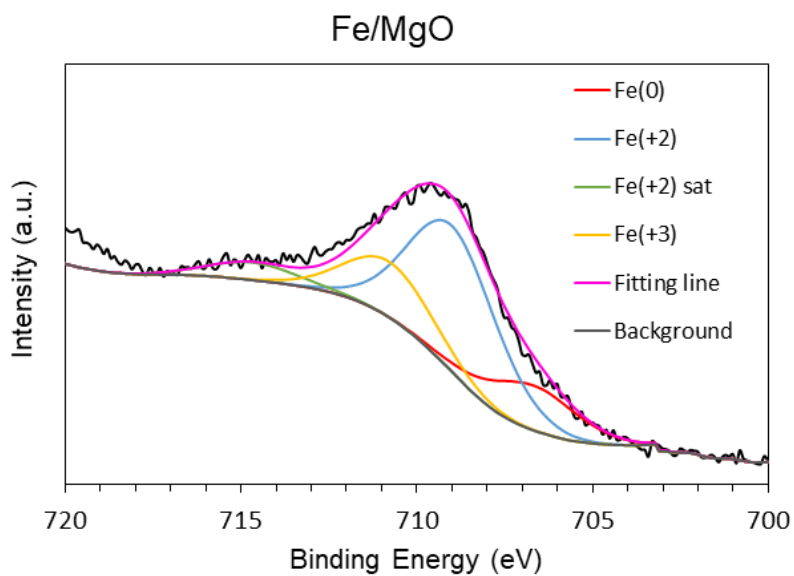

Relative ratio (%)  
 $\text{Fe}^0 : \text{Fe}^{2+} : \text{Fe}^{3+} = 18.2 : 59.1 : 22.6$

**Fig. S9** Deconvolution of Fe 2p XPS spectra for Fe-C/MgO and Fe/MgO

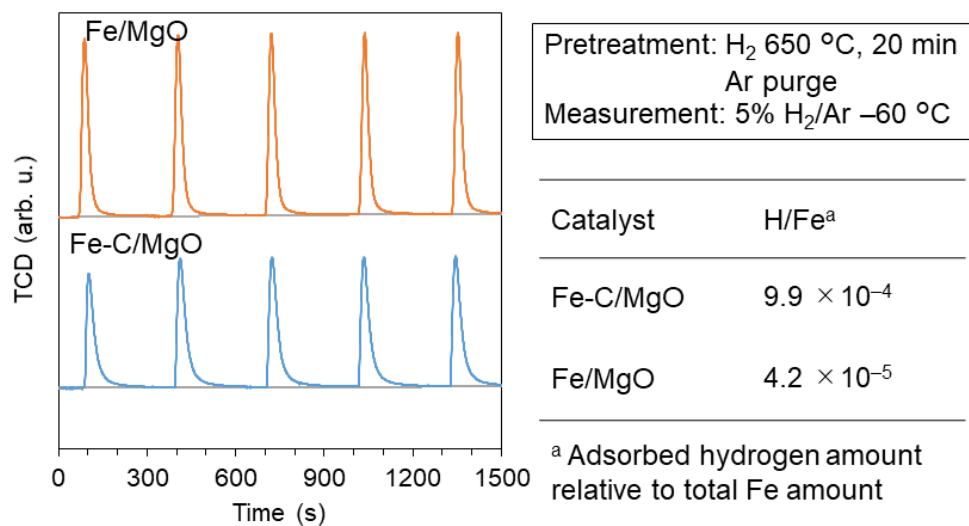

**Fig. S10** H<sub>2</sub>-pulse for Fe-C/MgO and Fe/MgO

Difference IR spectra from spectrum at 150 °C

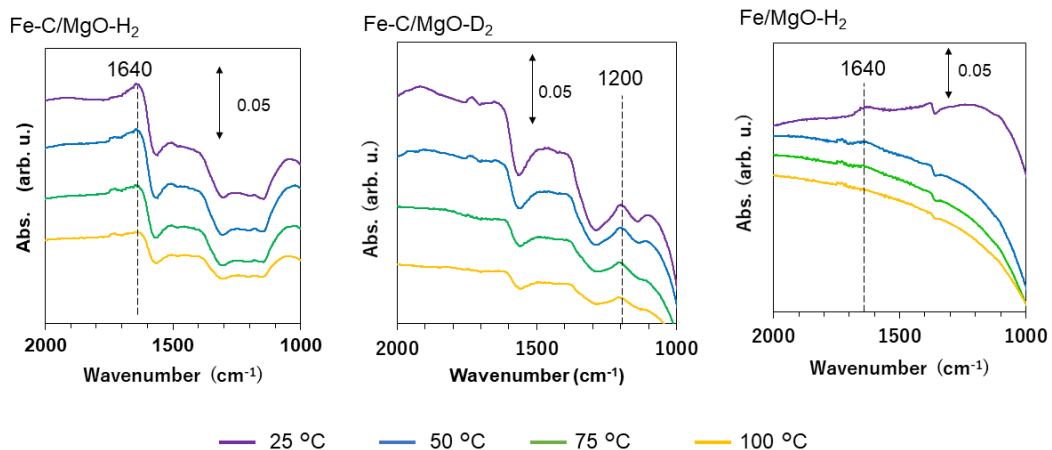

Raw IR spectra

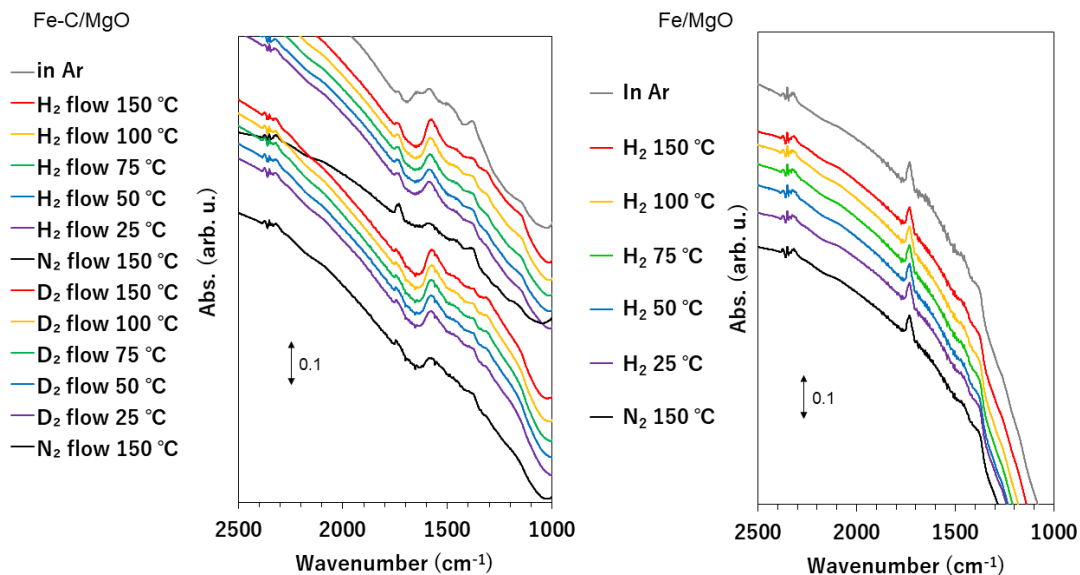

**Fig. S11** H<sub>2</sub> and D<sub>2</sub>-probed FT-IR spectra for Fe-C/MgO and Fe/MgO

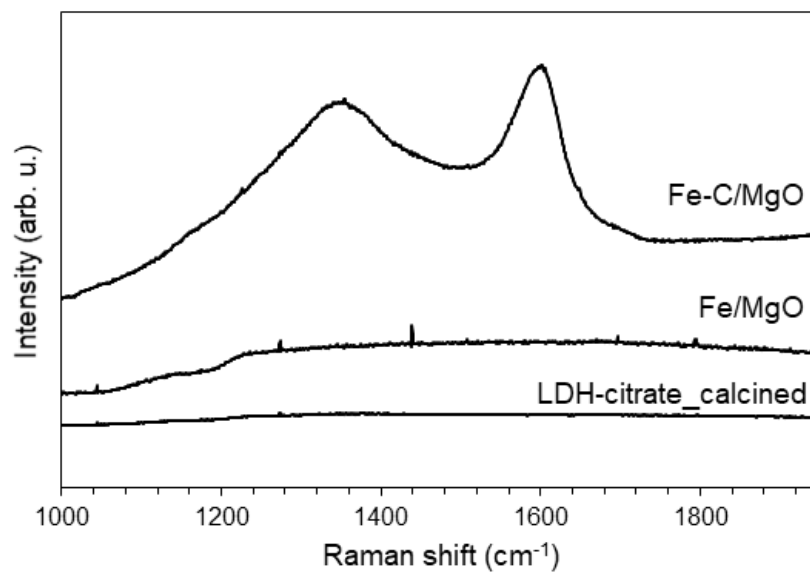

**Fig. S12** Raman spectra for Fe-C/MgO, Fe/MgO, and LDH-citrate calcined in static air.

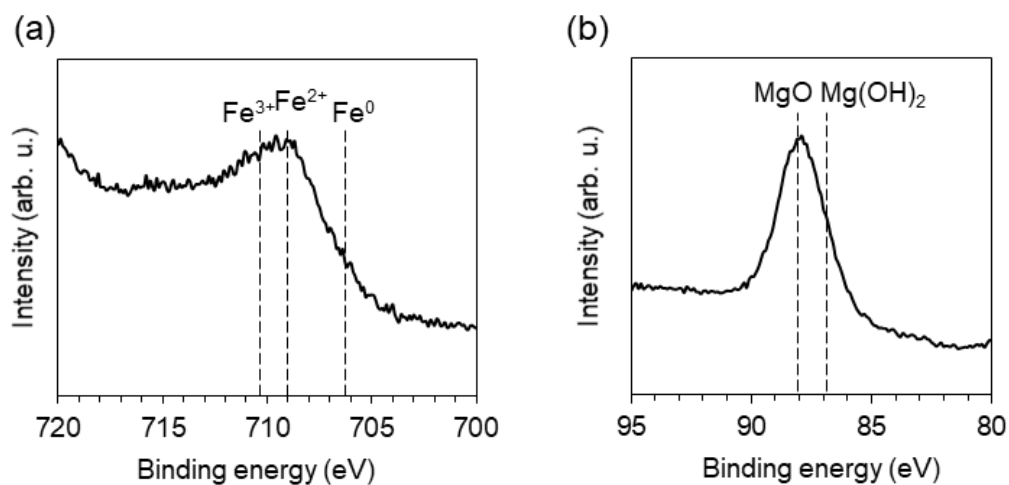

**Fig. S13** (a) Fe 2p and (b) Mg 2s XPS spectra for Fe-C/MgO prepared by the reduction at 550 °C without exposure to air.

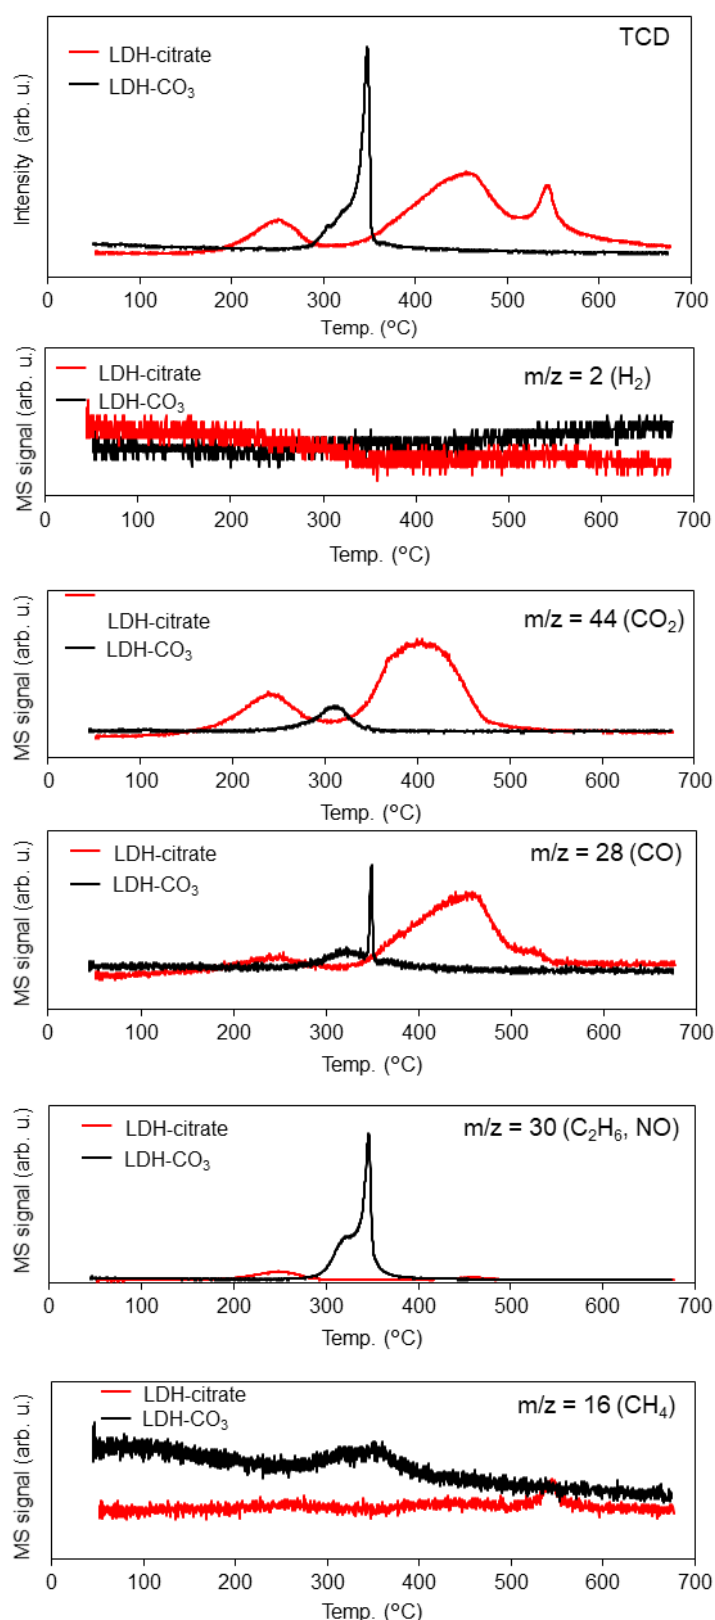

**Fig. S14** TPR profiles for LDH-citrate and LDH-CO<sub>3</sub>.

Conditions: sample 10 mg with H<sub>2</sub> flow (30 mL/min) from 50 to 700 °C

Hydrogen consumption cannot be observed because a large amount of gases is produced. Because the sample tube would break due to the generation of a large amount of gases, a small amount of sample was used for the measurement.



## 9. References

- (S1) H. Hu, M. Qiao, S. Wang, K. Fan, H. Li, B. Zong and X. Zhang, *J. Catal.*, 2004, **221**, 612–618.
- (S2) Y. Liu, S. He, Z. Quan, H. Cai, Y. Zhao and B. Wang, *Green Chem.*, 2019, **21**, 830–838.
- (S3) Ramachandran, P. V.; Alawaed, A. A. Room Temperature Reduction of Titanium Tetrachloride-Activated Nitriles to Primary Amines with Ammonia-Borane. *Molecules* **2023**, *28*, 60.
- (S4) M. Erdélyi, M. Varedian, C. Sköld, I. B. Niklasson, J. Nurbo, A. Persson, J. Bergquist and A. Gogoll, *Org. Biomol. Chem.*, 2008, **6**, 4356–4373.
- (S5) P. Falus, Z. Boros, G. Hornyánszky, J. Nagy, F. Darvas, L. Üрге and L. Poppe, *Tetrahedron Lett.*, 2011, **52**, 1310–1312.
- (S6) Y. Liu, W. Miao, W. Tang, D. Xue, J. Xiao, C. Wang and C. Li, *Chem. Asian J.*, 2021, **16**, 1725–1729.
- (S7) S. Imm, S. Bähn, L. Neubert, H. Neumann and M. Beller, *Angew. Chem. Int. Ed.*, 2010, **49**, 8126–8129.
- (S8) C. M. Kisukuri, J. L. M. S. Reis, T. S. Rodrigues, P. H. C. Camargo and L. H. Andrade, *ChemCatChem*, 2016, **8**, 3657–3662.
- (S9) T. Stemmler, A.-E. Surkus, M.-M. Pohl, K. Junge, K. and M. Beller, *ChemSusChem*, 2014, **7**, 3012–3016.
- (S10) C. Bäumler, C. Bauer and R. Kempe, *ChemSusChem*, 2020, **13**, 3110–3114.
- (S11) X. Long, Z. Li, G. Gao, P. Sun, J. Wang, B. Zhang, J. Zhong, Z. Jiang and F. Li, *Nat. Commun.* **2020**, *11*, 4074.
- (S12) X. Zhuang, X. Wei, X. Hu, Q. Zhang, X. Zhang, L. Chen, J. Liu and L. Ma, *Green Chem.*, 2023, **25**, 7109–7125.
